# Supplementary material for: A Ubiquitous Platform for Bacterial Nanotube Biogenesis
Source: PubMed Central journal article supplement — Cell Rep. 2019 Mar 28;27(2):334–342.e10. doi: 10.1016/j.celrep.2019.02.055 (PMC6456723; doi:10.1016/j.celrep.2019.02.055), 2019-03-28
Supplement: mmc3.pdf [file mmc3.pdf]

## A Ubiquitous Platform for Bacterial Nanotube Biogenesis

### Graphical Abstract

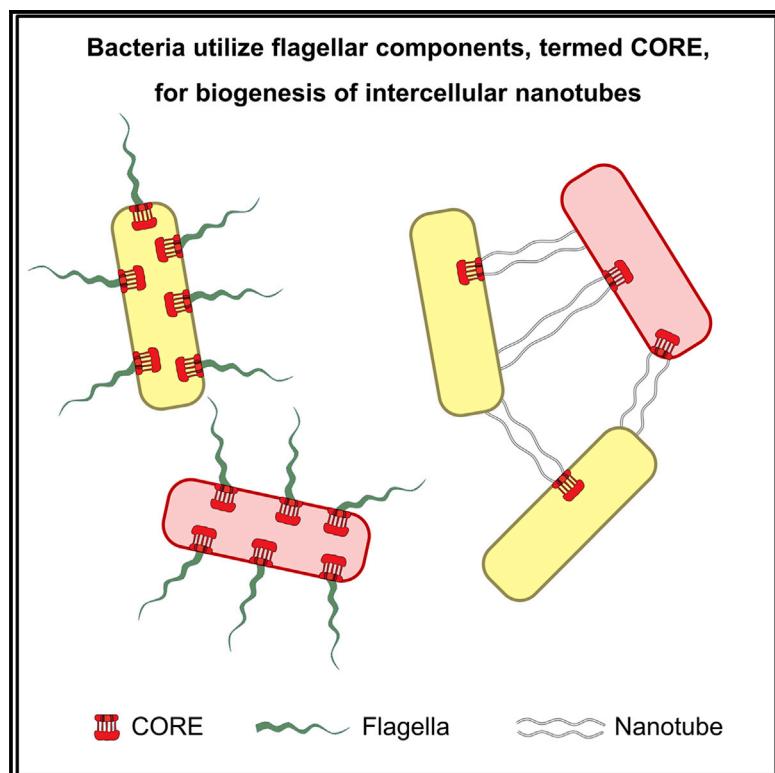

### Authors

Saurabh Bhattacharya, Amit K. Baidya, Ritesh Ranjan Pal, ..., Hanah Margalit, Ilan Rosenshine, Sigal Ben-Yehuda

### Correspondence

ilanr@ekmd.huji.ac.il (I.R.), sigalb@ekmd.huji.ac.il (S.B.-Y.)

### In Brief

Bhattacharya et al. show that bacterial intercellular nanotubes, facilitating cytoplasmic molecular exchange among cells, emerge from conserved CORE components of the flagellar export apparatus. CORE-mediated nanotube formation is widespread among bacterial species. The results establish the CORE-derived nanotube as a ubiquitous organelle, facilitating intercellular molecular trafficking across the bacterial kingdom.

### Highlights

- Conserved flagellar CORE components dually serve for flagella and nanotube assembly
- CORE mutants are deficient in nanotube formation and intercellular molecular trade
- CORE-dependent nanotube production is conserved among distinct bacterial species
- The CORE-nanotube organelle can provide a common path for bacterial molecular trade

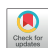

# A Ubiquitous Platform for Bacterial Nanotube Biogenesis

Saurabh Bhattacharya,<sup>1,3</sup> Amit K. Baidya,<sup>1,3</sup> Ritesh Ranjan Pal,<sup>1</sup> Gideon Mamou,<sup>1,2</sup> Yair E. Gatt,<sup>1</sup> Hanah Margalit,<sup>1</sup> Ilan Rosenshine,<sup>1,\*</sup> and Sigal Ben-Yehuda<sup>1,4,\*</sup>

<sup>1</sup>Department of Microbiology and Molecular Genetics, Institute for Medical Research Israel-Canada, The Hebrew University-Hadassah Medical School, POB 12272, The Hebrew University of Jerusalem, 91120 Jerusalem, Israel

<sup>2</sup>Present address: Department of Biochemistry, University of Oxford, South Parks Road, Oxford OX13QU, UK

<sup>3</sup>These authors contributed equally

<sup>4</sup>Lead Contact

\*Correspondence: ilanr@ekmd.huji.ac.il (I.R.), sigalb@ekmd.huji.ac.il (S.B.-Y.)

<https://doi.org/10.1016/j.celrep.2019.02.055>

## SUMMARY

We have previously described the existence of membranous nanotubes, bridging adjacent bacteria, facilitating intercellular trafficking of nutrients, cytoplasmic proteins, and even plasmids, yet components enabling their biogenesis remain elusive. Here we reveal the identity of a molecular apparatus providing a platform for nanotube biogenesis. Using *Bacillus subtilis* (*Bs*), we demonstrate that conserved components of the flagellar export apparatus (FliO, FliP, FliQ, FliR, FliH, and FliA), designated CORE, dually serve for flagellum and nanotube assembly. Mutants lacking CORE genes, but not other flagellar components, are deficient in both nanotube production and the associated intercellular molecular trafficking. In accord, CORE components are located at sites of nanotube emergence. Deleting COREs of distinct species established that CORE-mediated nanotube formation is widespread. Furthermore, exogenous COREs from diverse species could restore nanotube generation and functionality in *Bs* lacking endogenous CORE. Our results demonstrate that the CORE-derived nanotube is a ubiquitous organelle that facilitates intercellular molecular trade across the bacterial kingdom.

## INTRODUCTION

Bacteria residing in natural communities maintain intricate molecular crosstalk with proximal prokaryotic and eukaryotic cells. Dedicated machineries such as type III, IV, and VI secretion systems are used by bacteria to conduct contact-dependent molecular delivery among species, as well as across kingdoms (Costa et al., 2015; Hayes et al., 2010). We have previously described a type of bacterial contact-dependent interaction mediated by membranous conduits, termed nanotubes, bridging neighboring cells of the bacterium *Bacillus subtilis* (*Bs*) (Dubey and Ben-Yehuda, 2011; Dubey et al., 2016). In fact, nanotube-

like structures were shown to be produced by multiple bacterial species, mainly when grown on solid surfaces or in biofilm assemblies (e.g., McCaig et al., 2013; Pande et al., 2015; Wei et al., 2014); however, their function remains mostly elusive. Our previous analysis revealed that nanotubes serve as conduits for an intercellular exchange of cytoplasmic proteins and even plasmids (Baidya et al., 2018; Dubey and Ben-Yehuda, 2011; Dubey et al., 2016; Stempler et al., 2017). Furthermore, we and others reported that nanotubes facilitate interspecies molecular trafficking, including that of nutrients and toxins (Benomar et al., 2015; Pande et al., 2015; Stempler et al., 2017).

Inspired by these results, we recently discovered that enteropathogenic *E. coli* (EPEC) uses nanotubes to interact with infected epithelial cells (Pal et al., 2019). The formation of these nanotubes was dependent on five inner membrane proteins, composing the export apparatus of the type III secretion system (T3SS), embedded within the injectisome, the major virulence machinery of EPEC (Pal et al., 2019). The Gram-positive *Bs* lacks injectisome, which is restricted to Gram-negative pathogens, but its flagellum harbors integral T3SS, including an export apparatus (Abby and Rocha, 2012; Diepold and Armitage, 2015; Diepold and Wagner, 2014). We thus hypothesized that the *Bs* flagellar export apparatus, termed here CORE (CORE-F<sub>BS</sub>), is required not only for motility (Hueck, 1998) but also for nanotube generation. The CORE, situated at the basal body of the flagella, is composed of five channel-forming integral membrane proteins, FliP, FliQ, FliR, FliH, and FliA, exhibiting a stoichiometry of 5:4:1:1:9, respectively (Dietsche et al., 2016; Fukumura et al., 2017; Kuhlén et al., 2018) (Figure 1A). In addition, FliO, a non-structural component of the CORE, serves as a scaffold for the assembly of FliP multimeric ring, the presumed nucleation step of the CORE complex assembly (Fabiani et al., 2017; Fukumura et al., 2017).

Here we describe that the CORE complex, the central constituent of the bacterial flagellum, has a dual utility, serving as a platform for both flagellum and nanotube biogenesis. We reveal that the CORE is positioned at sites of nanotube emergence, enabling their production along with the associated intercellular molecular exchange. Subsequently, by using bioinformatics and functional analyses, we show that the sequence and utility of CORE components are conserved among distinct bacterial species. Taken together, our results expose the existence of a bacterial organelle related to flagella and injectisome that is likely to

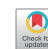

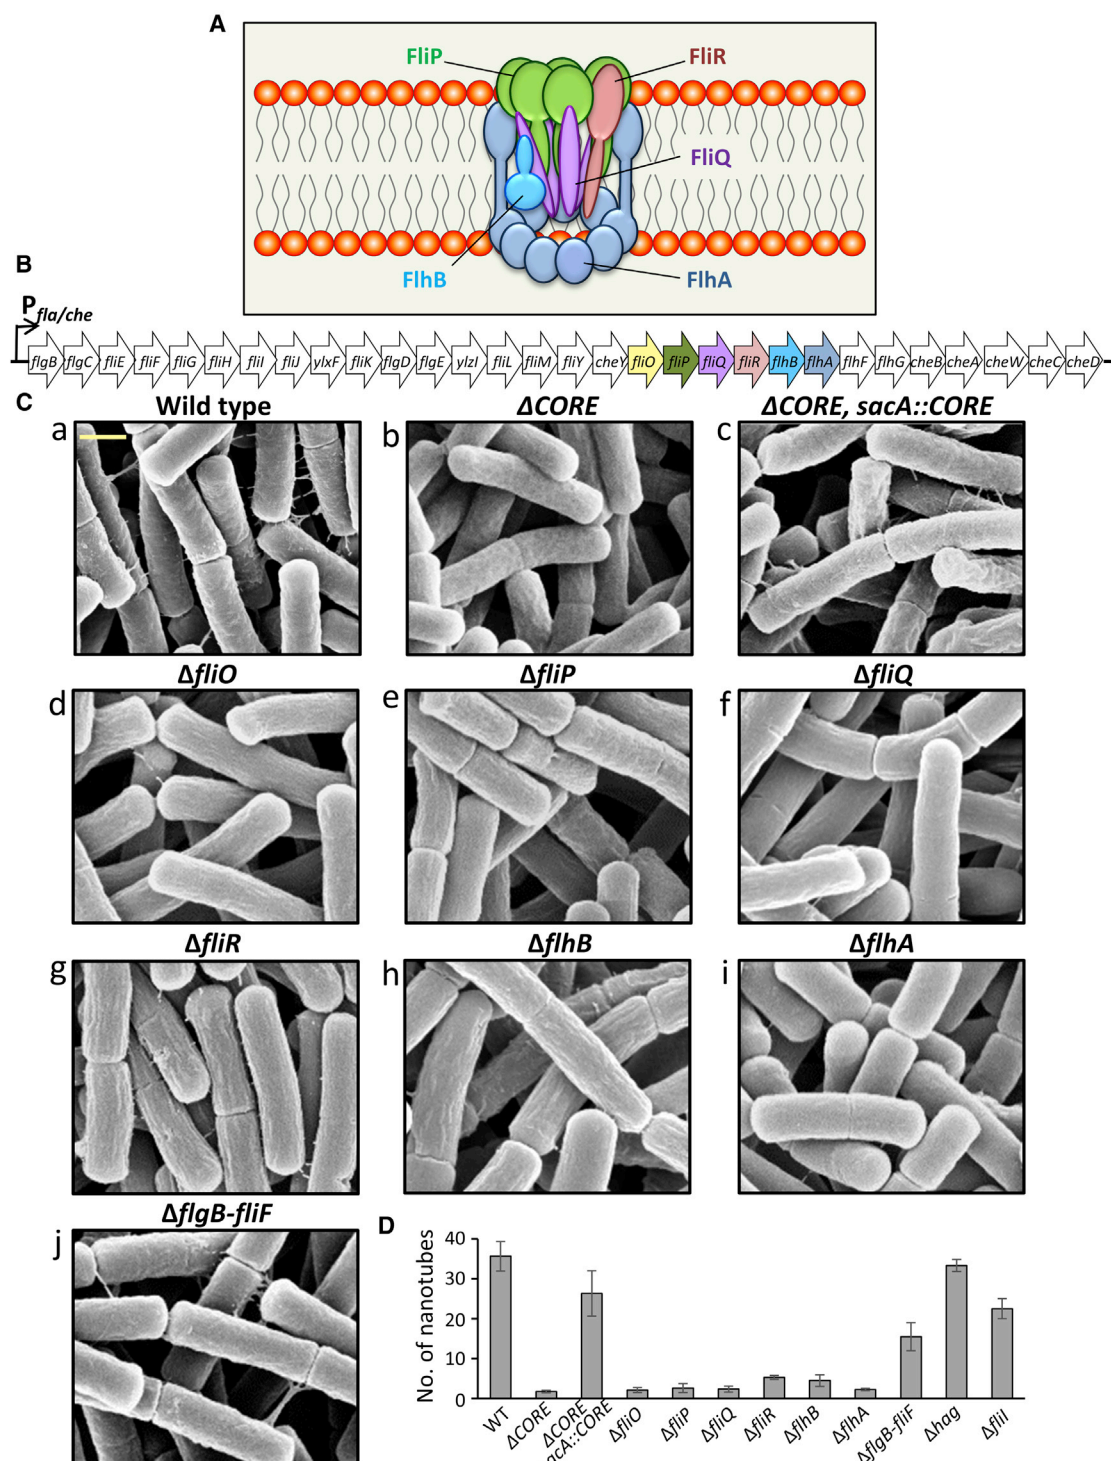

**Figure 1. *Bs* CORE Mutants Are Impaired in Nanotube Formation**

(A) Schematic illustration of the flagellar CORE apparatus on the basis of Fukumura et al. (2017) and Kuhlen et al. (2018). The CORE consists of FliP, FliQ, FliR, FliB, and FliA (5:4:1:1:9) transmembrane proteins and the chaperone FliO (not shown), which only transiently associates with the CORE complex.

(B) A map depicting the *fla/che* operon of *Bs*, encoding the components required for flagellar basal body formation. Genes encoding the CORE proteins are highlighted with the same color code as in (A).

(legend continued on next page)

provide a major and prevalent route for intercellular molecular exchange in bacteria.

## RESULTS

### Flagellar CORE Proteins Are Required for Nanotube Formation

To investigate whether CORE- $F_{Bs}$  is required for nanotube formation, we generated a non-polar deletion of a chromosomal fragment, containing the five CORE genes *fliP*, *fliQ*, *fliR*, *flhB*, and *flhA*, as well as *fliO*, encoding the CORE-associated chaperone ( $\Delta$ CORE) (Figures 1A and 1B) (Fabiani et al., 2017; Fukumura et al., 2017). We then used extreme-high-resolution scanning electron microscopy (XHR-SEM) to examine the capacity of this mutant to form nanotubes on a solid surface, conditions restricting flagella formation and facilitating nanotube biogenesis (Dubey and Ben-Yehuda, 2011). Remarkably, the  $\Delta$ CORE mutant exhibited severe deficiency in the formation of intercellular nanotubes (Figures 1Ca, 1Cb, and 1D). Consistently, the mutant was blocked in generating extending nanotubes (Figure S1A), shown to be produced at low cell density (Dubey et al., 2016). Ectopic complementation of the mutant with CORE genes restored nanotube formation to that of wild-type levels (Figures 1Cc and 1D). Importantly, nanotube structures were readily evident in bacteria deleted of genes encoding non-CORE key flagellar components. These include mutants lacking *hag*, encoding flagellin; *flgB*, *flgC*, *fliE*, and *fliF* ( $\Delta$ *flgB*–*fliF*), encoding non-CORE basal body components; and *fliI*, encoding the flagellar ATPase, a key component of the CORE-associated sorting platform (Figures 1B, 1Cj, 1D, and S1B) (Minamino and Imada, 2015). These results indicate that the defect observed in nanotube production can be directly attributed to the function of the CORE, suggesting a dual function for this complex in biogenesis of either flagella or nanotubes.

To elucidate whether all six CORE genes are required for nanotube projection, we deleted each gene individually. Strains lacking *fliO*, *fliP*, *fliQ*, or *flhA* were severely deficient in nanotube construction, whereas *flhB* mutant could seldom form nanotubes, but these were very slim and frequently torn apart (Figures 1Cd–1Ci and 1D). Interestingly, *fliR* mutant generated very short projections, exhibiting a bristle-like shape (Figure 1Cg), suggesting that nanotube formation was initiated but their elongation process was halted. Reintroducing each CORE gene into the corresponding CORE mutant restored nanotube development (Figures S1C and S1D). Thus, all CORE components are required for production of proper nanotubes, though lack of each component affects the process with slight variations, highlighting further complexity layer in nanotube generation.

### CORE- $F_{Bs}$ Is Required for Intercellular Molecular Trade

Having established that the CORE genes are required for nanotube development, we next sought to explore their influence on

intercellular molecular exchange. Previously, we found that mixing two strains, each harboring a different antibiotic resistance gene, results in the exchange of antibiotic resistance enzymes in a nanotube-dependent path, yielding a population of cells transiently resistant to both antibiotics (protein exchange). Furthermore, in a similar manner, we detected the delivery of a non-conjugative plasmid from donor to recipient (plasmid exchange) (Dubey and Ben-Yehuda, 2011). Indeed, a *Bs* mutant lacking the CORE genes was severely deficient in both protein and plasmid exchange (Figure 2). Consistently, both defects were cured by reintroducing the CORE genes into the mutant strain (Figure 2). Analyzing the CORE single mutants revealed that they were all significantly impaired in protein exchange, with  $\Delta$ *flhA* and  $\Delta$ *flhB* showing the most severe phenotype, whereas *fliR* mutant, harboring the bristle-like nanotubes, was the least affected (Figures 1Cg and 2). Moreover, each and every single mutant was fully defective in plasmid exchange (Figure 2), indicating that such event exemplifies a more challenging task than protein trade. Importantly, none of the CORE mutants exhibited any measurable growth defect (Figures S1E and S1F). The capacity to exchange proteins and plasmids was regained by complementing the individual CORE mutants with the corresponding CORE gene (Figure S2A). Mutants lacking non-CORE flagellum genes (*flgB*–*fliF*, *fliI*, and *hag*) were capable of performing molecular exchange, while their motility was fully blocked (Figure 2). Notably,  $\Delta$ *flgB*–*fliF* and  $\Delta$ *fliI* strains exhibited minor deficiency in both protein and plasmid exchange that is consistent with the modestly reduced number of nanotube structures detected (Figures 1D and 2). Because the expression of CORE genes was not perturbed by these mutations (Figure S1G), this effect might imply some role of these proteins in stabilizing the CORE complex. Overall, our results strengthen the view that the CORE- $F_{Bs}$  mediates intercellular molecular trafficking via nanotubes.

Next, we examined the impact of CORE on nanotube-dependent interspecies interactions. We have previously shown that *Bs* kills neighboring *B. megaterium* (*Bm*) cells by delivering the tRNase toxin WapA via nanotubes (Stempler et al., 2017). GFP-labeled *Bs* was mixed with *Bm*, and cells were visualized using time-lapse microscopy. *Bs* cells, lacking CORE, indeed failed to arrest *Bm* growth and division, inferring that the transfer of WapA toxin into *Bm* cells was impeded (Figure S2B). Consistently, ectopic expression of CORE genes restored this capability (Figure S2B). Thus, interspecies delivery of WapA via nanotubes is CORE dependent.

### CORE Components Are Localized to the Site of Nanotube Emergence

Since the CORE complex is a prime constituent of the flagellar basal body (Diepold and Wagner, 2014), we posited that in a similar fashion, the CORE forms a platform from which nanotubes emerge and extend. The major CORE component FlhA,

(C) The indicated *Bs* CORE mutant strains were visualized using XHR-SEM to monitor the formation of intercellular nanotubes. Strains were grown to the mid-logarithmic phase, spotted onto EM grids, incubated on LB agar plates for 4 h at 37°C, and visualized using XHR-SEM. Scale bar represents 500 nm.

(D) Quantification of the average number of nanotubes displayed per 50 cells by the indicated *Bs* mutant strains following XHR-SEM analysis described in (C). Shown are average values and SD of at least three independent experiments ( $n \geq 200$  for each strain).

See also Figure S1.



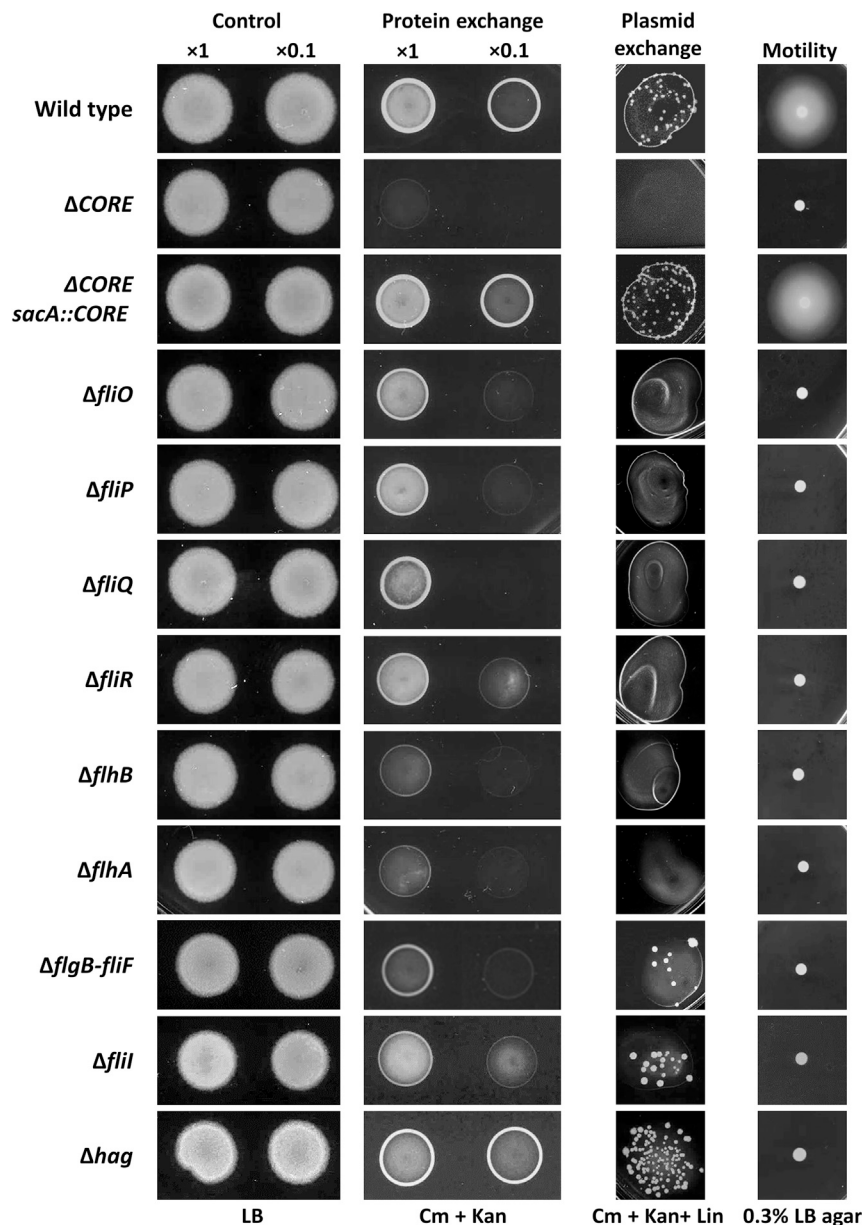

**Figure 2. *Bs* CORE Mutants Are Deficient in Molecular Exchange**

Assessing molecular exchange in *CORE* mutants. For protein exchange assay, pairs of a donor (SB463: *amyE::P<sub>hyper-spank</sub>-cat-spec*) ( $\text{Cm}^{\text{R}}$ ,  $\text{Spec}^{\text{R}}$ ) and a recipient (SB513: *amyE::P<sub>hyper-spank</sub>-gfp-kan*) ( $\text{Kan}^{\text{R}}$ ) parental strains (wild-type) were used. The investigated mutants harbor the corresponding genotypes and carry the indicated null mutation in both donor and recipient strains. Donor and recipient strains were mixed in 1:1 ratio (at two concentrations, 1 $\times$  and 0.1 $\times$ ) and incubated in LB supplemented with 1 mM IPTG for 4 h at 37 $^{\circ}\text{C}$  with gentle shaking. Equal numbers of cells were then spotted onto LB agar (control) and LB agar containing chloramphenicol (Cm) and kanamycin (Kan) (protein exchange) and photographed after 18 h. For plasmid exchange assay, pairs of a donor (GD110: *amyE::P<sub>hyper-spank</sub>-cat-spec*, pHB201/*cat*, *erm*) ( $\text{Cm}^{\text{R}}$ ,  $\text{Spec}^{\text{R}}$ ,  $\text{Mls}^{\text{R}}$ ) and a recipient (SB513: *amyE::P<sub>hyper-spank</sub>-gfp-kan*) ( $\text{Kan}^{\text{R}}$ ) parental strains (wild-type) were used, with the investigated mutants harbor in addition the indicated null mutation in both donor and recipient strains. Cells were mixed in 1:1 ratio (concentration 1 $\times$ ), processed as described for protein exchange, and spotted onto LB agar containing Cm, Kan, and lincomycin (Lin) (plasmid exchange). Cells were incubated at 37 $^{\circ}\text{C}$ , and colonies were photographed after 36 h of incubation. For motility assay, wild-type (PY79) and the indicated mutant strains were grown to the mid-logarithmic phase and spotted onto LB plates containing 0.3% agar and photographed after 7 h of incubation at 37 $^{\circ}\text{C}$  (motility). See also [Figures S1](#) and [S2](#).

at the site of nanotube emanation, signifying that indeed the CORE serves as the basal body for nanotube construction ([Figures 3A](#) and [3B](#)). Consistently, signal from FliP was also detected at the origin of extending nanotubes ([Figure S4A](#)). Tagging FliP at a site predicted to form a surface-exposed loop ([Fukumura et al., 2017](#)) showed a similar outcome ([Figure S4B](#)). Furthermore, use of a mutant ( $\Delta mbI$ ) exhibiting a defect in cell wall assembly

harboring a large cytoplasmic domain ([Figure 1A](#)) ([Morimoto et al., 2014](#)), was fused to GFP. The fusion rendered the protein partially functional ([Figures S3A–S3C](#)); however, the few nanotubes produced by these cells emerged from sites adjacent to FliA-GFP focal assemblies ([Figures S3D](#) and [S3E](#)), hinting that nanotubes are projected from CORE-containing complexes. To further establish this notion, we co-visualized nanotubes and CORE components at high resolution by using immuno-XHR-SEM. To this end, FliP was HA-tagged in its C terminus, predicted to be exposed at the cell surface ([Fukumura et al., 2017](#)) ([Figure 1A](#)), and introduced into the *Bs* genome ectopically. Next, cells were subjected to immuno-XHR-SEM, using primary anti-HA antibody followed by gold-labeled secondary antibodies. Strikingly, a gold particle was recurrently observed

([Jones et al., 2001](#)) to improve antibody accessibility to CORE complexes, or a strain harboring tagged *fliP* as a sole copy, yielded a similar gold labeling pattern ([Figures 3C](#), [3D](#), and [S4C](#)). Significantly, in all viewed cases (25), the signal from FliP was restricted to only one end of a connecting nanotube, suggesting that the CORE is exploited for nanotube projection by the producing cell, while docking on a recipient cell is CORE independent. Of note, detection of only a single gold particle (18 nm) associated with the FliP multimeric ring (10 nm in diameter; [Fukumura et al., 2017](#); [Kuhlen et al., 2018](#)) is most likely due to resolution limit or steric hindrance. As a control, no gold signal was obtained from cells lacking the HA tagged protein ([Figure S4D](#)) or from cells expressing a membrane protein tagged at a site facing the cytoplasm ([Figures S4E](#) and [S4F](#)) ([Rudner](#)

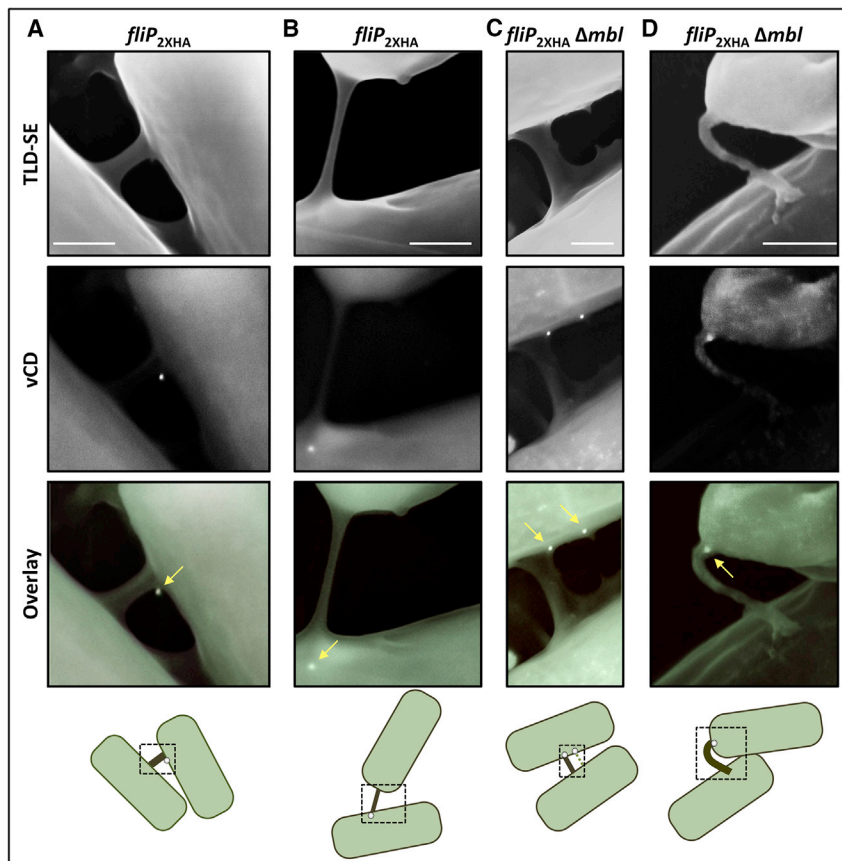

**Figure 3. FliP Localizes to the Base of Nanotubes**

Cells expressing HA-tagged FliP (SH93: *amyE::P<sub>hyper-spank</sub>-fliP<sub>2xHA</sub>, sacA::P<sub>hyper-spank</sub>-ymdB*, A and B, or SH110: *amyE::P<sub>hyper-spank</sub>-fliP<sub>2xHA</sub>, sacA::P<sub>hyper-spank</sub>-ymdB, Δmbl*, C and D) were spotted onto EM grids and subjected to immuno-gold XHR-SEM, using primary antibodies against HA and secondary gold-conjugated antibodies. Samples were not coated before observation. Examples of FliP<sub>2xHA</sub> localization (white dots) at the base of nanotubes are presented (indicated by arrows). Shown are XHR-SEM images that were acquired using TLD-SE (through-lens detector-secondary electron) for nanotubes visualization and vCD (low-kV high-contrast backscattered detector) for gold particle detection, as well as overlay of both images. Schematic below depicts the interpretive cell layout and highlights the nanotube region with gold signal (dashed box) captured by XHR-SEM. Scale bars represent 200 nm. See also Figures S3 and S4.

prompted the formation of intercellular nanotubular structures to a level close to that of wild-type *Bs* (Figures 4B and 4C). Compellingly, also *CORE-F<sub>Lm</sub>* and *CORE-F<sub>Ec</sub>* genes induced the formation of nanotubes in *Bs* Δ*CORE*, although of an apparent thin morphology (Figures 4B and 4C). Interestingly, however, motility was reestablished by *CORE-F<sub>Bm</sub>* but could not be restored by *CORE-F<sub>Lm</sub>* or *CORE-F<sub>Ec</sub>* (Figure 4D). Consistent with

et al., 2002). Furthermore, cells harboring a surface-exposed tag in an unrelated membrane protein yielded a scattered pattern, which did not coincide with nanotube emanation sites (Tzipilivich et al., 2017) (Figures S4G and S4H). Hence, we conclude that the CORE provides a platform for nanotube emergence.

### Flagellar CORE Complexes Are Used for Nanotube Formation by Diverse Species

On the basis of our results, we asked whether the flagellar CORE of other bacterial species is bi-functional and similarly to *CORE-F<sub>Bs</sub>* can give rise to both flagella and nanotubes. We thus deleted the *CORE* genes from the genomes of *Bm*, a close relative of *Bs*, the Gram-positive human pathogen *Listeria monocytogenes* (*Lm*), and the evolutionary distant *Escherichia coli* (*Ec*) (Table S1). Wild-type, Δ*CORE*, and mutants lacking the flagellum filament (Δ*flagellin*) from all tested species were incubated on a solid surface to induce nanotube formation and subsequently examined using XHR-SEM. While nanotube appendages were plentiful in wild-type and in strains devoid of flagellum filaments, they were absent from the corresponding *CORE* mutants (Figure 4A), hence corroborating that the flagellar CORE is used by diverse species for nanotube production.

We then investigated the cross-species functional conservation of COREs by testing the capacity of foreign flagellar CORE complexes to complement nanotube formation by *CORE* deficient *Bs*. Introducing *CORE-F<sub>Bm</sub>* genes into *Bs* Δ*CORE* mutant

the complete restoration of nanotubes by *CORE-F<sub>Bm</sub>*, both protein and plasmid exchange levels were regained to levels comparable with that of wild-type *Bs* (Figure 4D). In line with the limited nanotube restitution (Figure 4C), *CORE-F<sub>Lm</sub>* and *CORE-F<sub>Ec</sub>* enabled partial protein exchange but could not support plasmid exchange (Figure 4D), indicating that additional non-CORE components that differ among species are involved in this process. Taken together, our results suggest that distinct bacterial species carrying flagellar *CORE* genes have the potential to form nanotubes.

### CORE Complexes Are Universal and Phylogenetically Widespread

We next addressed the ubiquity of the *CORE* genes across the bacterial kingdom. Since previous such analyses included primarily genomes of Gram-negative bacteria (Abby and Rocha, 2012; Hu et al., 2017; Snyder et al., 2009), here we attempted to include representatives of the majority of the bacterial phyla. Using the STRING database homology data (Szklarczyk et al., 2017; von Mering et al., 2007), we analyzed 400 species belonging to 18 phyla. We found *CORE* genes to be widespread in all the examined bacterial phyla, typically as part of the flagellum or its homologous injectisome apparatus (Figure S5; Table S2). Interestingly, some bacteria lacking a substantial fraction of the gene cohort required for formation of these organelles still harbor the *CORE* genes that could function to nucleate

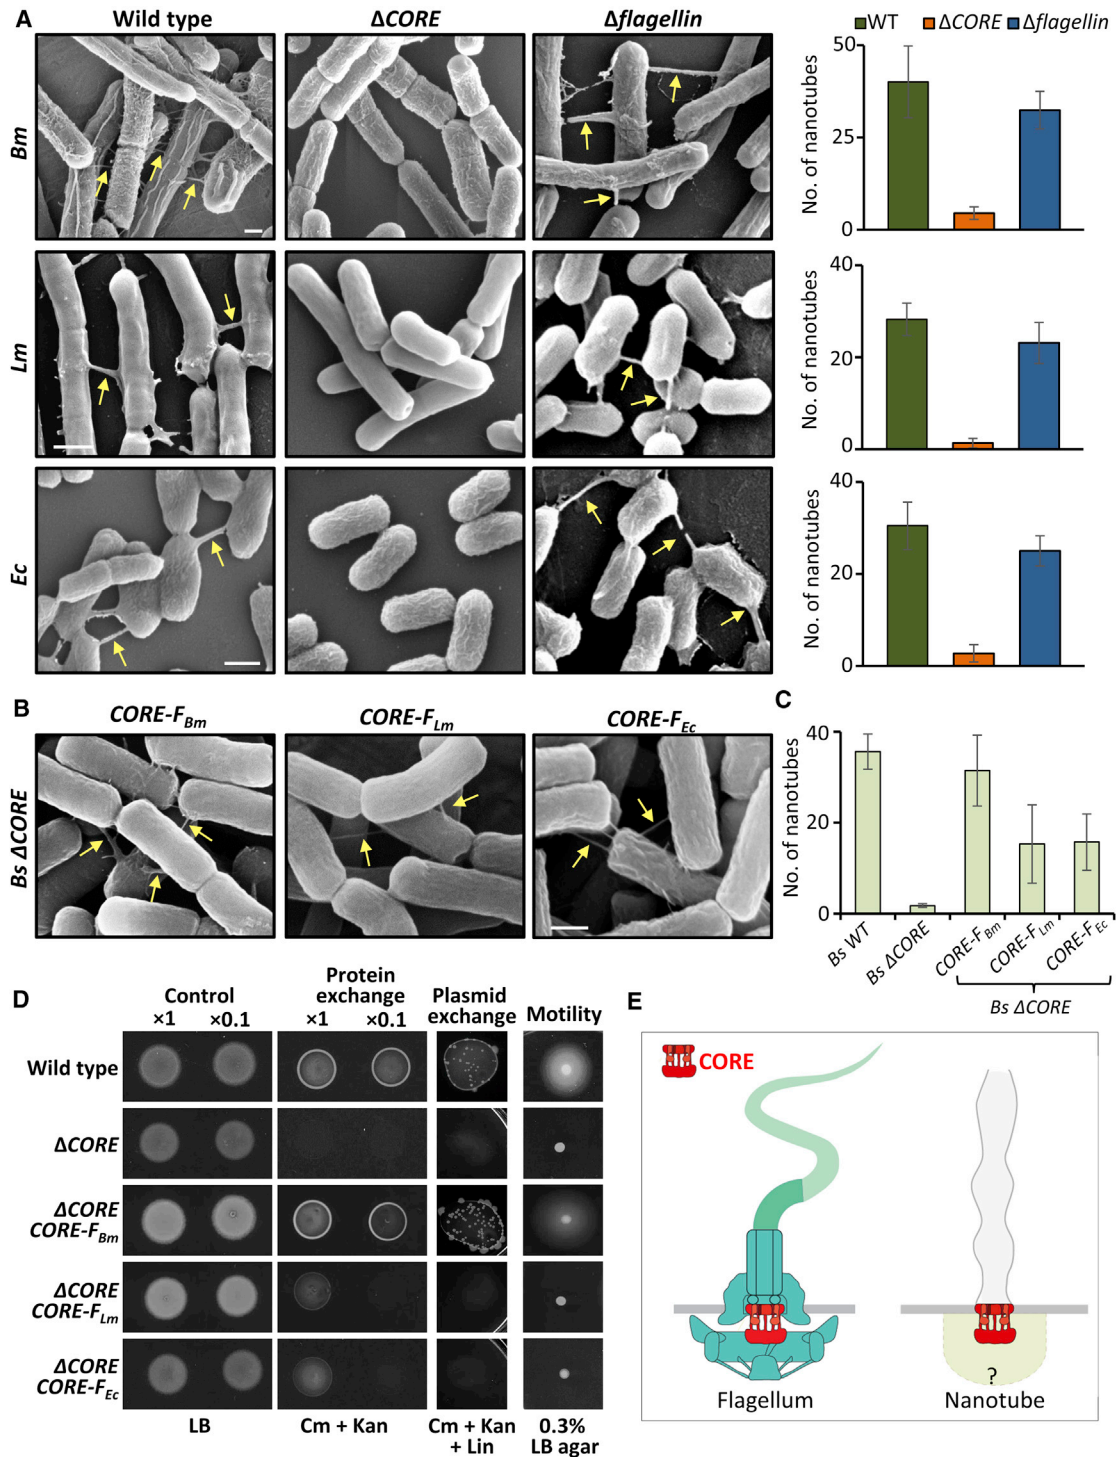

**Figure 4. CORE Is a Widespread Complex with Conserved Functions across Species**

(A) Wild-type *Bm* (OS2), *Lm* (10403S), and *Ec* (MG1655) and their corresponding mutant strains lacking *CORE* ( $\Delta$ CORE) or gene encoding flagellin ( $\Delta$ flagellin) were grown to the mid-logarithmic phase, spotted onto EM grids followed by incubation on LB agar plates for 4 h at 37°C, and visualized using XHR-SEM. Arrows indicate nanotubes. Scale bar represents 500 nm. Right: quantification of the average number of nanotubes displayed per 50 cells by the indicated strains following XHR-SEM analysis. Shown are average values and SD of at least three independent experiments ( $n \geq 200$  for each strain).

(B) Cells of *Bs* ( $\Delta$ CORE) complemented with *Bm* flagellar *CORE* ( $CORE-F_{Bm}$ ), *Lm* flagellar *CORE* ( $CORE-F_{Lm}$ ), and *Ec* flagellar *CORE* ( $CORE-F_{Ec}$ ) were processed as in (A) and visualized using XHR-SEM. Arrows indicate nanotubes. Scale bar represents 500 nm.

(legend continued on next page)



exclusively nanotube biogenesis. These bacteria include *Myxococci* species (phylum Proteobacteria), *Chloracidobacterium thermophilum* (phylum Acidobacteria), and *Succinatimonas hippie* (phylum Proteobacteria) (Figure S5; Table S2) (Abby and Rocha, 2012; Hu et al., 2017). Overall, this examination emphasizes that a wide spectrum of species possesses the potential to produce nanotubes and use them for molecular exchange.

## DISCUSSION

We uncovered that the export apparatus of the flagella, designated CORE, is a dual-functional complex, communally serving as a foundation for both flagella and nanotube generation (Figure 4E). This complex is likely to promote flagella formation by planktonic bacteria but alternates to support nanotube formation by bacteria grown on solid surfaces. The functional conservation of CORE complexes from distinct bacterial species was revealed by their ability to support nanotube formation in *Bs* mutant lacking endogenous CORE genes. Our findings insinuate that CORE-dependent molecular trafficking among bacteria is extensive and broad and includes a large array of cytoplasmic molecules. As such, it fundamentally expands the bacterial metabolic flexibility, facilitating the acquisition of new features. Furthermore, the observation that even plasmid trafficking uses CORE-dependent nanotubes highlights the potential impact of CORE complexes on horizontal gene transfer in nature. In the accompanying study, we discovered a similar set of highly conserved injectisome CORE proteins in EPEC to be implicated in extraction of cytoplasmic molecules from infected human host cells via nanotubes (Pal et al., 2019). On the basis of our findings, we postulate that the CORE represents an evolutionary ancestral functional unit, which subsequently evolved by acquisition of additional components, into nanotube, flagellum, or injectisome.

Some bacteria, including *Vibrio cholerae* and *Helicobacter pylori*, form flagella encased by membranous protrusions, termed “sheathed flagella.” Intriguingly, these bacteria were reported to occasionally produce “empty sheaths,” with a structure highly resembling nanotubes (Allen and Baumann, 1971; Geis et al., 1993; McCarter, 2001). Furthermore, the existence of isolated orphan CORE components in various bacterial genomes, frequently referred to as truncated or incomplete sys-

tems (Pallen and Matzke, 2006; Ren et al., 2005), insinuates their potential nanotube designation.

The discovery that CORE serves as a platform for nanotube biogenesis could provide the foundation for elucidating central aspects of nanotube functionality, such as the selection of the delivered molecular cargo, the source of energy used for cargo transportation, the directionality of nanotube operation, and the fusion mechanism with recipient cell membrane. Further mechanistic insight into nanotube biogenesis and function may escort the development of innovative methodologies, enabling control of intercellular molecular trade among bacteria, to attain intelligent bacterial community design.

## STAR★METHODS

Detailed methods are provided in the online version of this paper and include the following:

- KEY RESOURCES TABLE
- CONTACT FOR REAGENT AND RESOURCE SHARING
- EXPERIMENTAL MODEL AND SUBJECT DETAILS
  - Details on bacterial strain construction
- METHOD DETAILS
  - General growth conditions
  - Details on plasmid construction
  - Nanotube visualization by XHR-SEM
  - Immuno-XHR-SEM analysis
  - Molecular exchange assay
  - Motility assay
  - Fluorescence microscopy
  - RNA isolation and qRT-PCR
  - Phylogenetic analysis
- QUANTIFICATION AND STATISTICAL ANALYSIS

## SUPPLEMENTAL INFORMATION

Supplemental Information can be found with this article online at <https://doi.org/10.1016/j.celrep.2019.02.055>.

## ACKNOWLEDGMENTS

We thank E. Blayvas and A. Ben-Hur (Hebrew University) for help with XHR-SEM and R. Nir-Paz (Hadassah Hospital) and A. Herskovits (Tel Aviv University)

(C) Quantification of the average number of nanotubes displayed per 50 cells by the indicated strains following XHR-SEM analysis described in (B). Shown are average values and SD of at least three independent experiments ( $n \geq 200$  for each strain).

(D) Assessing molecular exchange in *Bs*  $\Delta$ CORE strain complemented with exogenous CORE genes. For protein exchange assay, pairs of a donor (SB463: *amyE::P<sub>hyper-spank</sub>-cat-spec*) ( $\text{Cm}^R$ ,  $\text{Spec}^R$ ) and a recipient (SB513: *amyE::P<sub>hyper-spank</sub>-gfp-kan*) ( $\text{Kan}^R$ ) parental strains (wild-type) were used. The investigated strains  $\Delta$ CORE and  $\Delta$ CORE complemented with *CORE-F<sub>Bm</sub>*, *CORE-F<sub>Lm</sub>*, and *CORE-F<sub>Ec</sub>* (controlled by *Bs P<sub>fla/che</sub>* promoter) harbor the corresponding genotypes of donor and recipient. Donor and recipient strains were mixed in 1:1 ratio (at two concentrations, 1× and 0.1×) and incubated in LB supplemented with 1 mM IPTG for 4 h at 37°C with gentle shaking. Equal numbers of cells were then spotted onto LB agar (control) and LB agar containing chloramphenicol (Cm) and kanamycin (Kan) (protein exchange) and photographed after 18 h. For plasmid exchange assay, pairs of a donor (GD110: *amyE::P<sub>hyper-spank</sub>-cat-spec*, pHB201/*cat*, *erm*) ( $\text{Cm}^R$ ,  $\text{Spec}^R$ ,  $\text{Mls}^R$ ) and a recipient (SB513: *amyE::P<sub>hyper-spank</sub>-gfp-kan*) ( $\text{Kan}^R$ ) parental strains (wild-type) were used. The investigated strains complemented with exogenous COREs harbor the corresponding genotypes of donor and recipient strains. Cells were mixed in 1:1 ratio (concentration 1×), processed as described for protein exchange, and spotted onto LB agar containing Cm, Kan, and lincomycin (Lin) (plasmid exchange). Cells were incubated at 37°C, and colonies were photographed after 36 h of incubation. For motility assay, wild-type (PY79) and the indicated strains were grown to mid-logarithmic phase, spotted onto LB plates containing 0.3% agar, and photographed after 7 h of incubation at 37°C (motility).

(E) A schematic model depicting the modularity of CORE complexes in flagellum and nanotube. CORE-associated components of the nanotube basal body are missing. Flagellum structure was adapted from (Dietsche et al., 2016).

See also Figure S5 and Tables S1 and S2.



for strains and plasmids. We are grateful to S. Wagner (Tubingen University) for help generating Figure 4E and valuable insight. We are indebted to A. Rouvinski (Hebrew University) and members of the Ben-Yehuda and Rosenshine laboratories for valuable discussions. This work was supported by a European Research Council Advance grant (339984) awarded to S.B.-Y.; a grant from the Israel Science Foundation (617/15) awarded to I.R.; a European Research Council Synergy grant (810186) awarded to S.B.-Y. and I.R.; and a grant from the Israel Science Foundation (876/17) awarded to H.M. S.B. is partially funded by the Lady Davis Fellowship Trust, and Y.E.G. is partially supported by the Hoffman Program.

## AUTHOR CONTRIBUTIONS

S.B., A.K.B., R.R.P., G.M., and Y.E.G. performed the experiments. S.B., A.K.B., R.R.P., Y.E.G., H.M., S.B.-Y., and I.R. conceived the experiments and analyzed the data. S.B., A.K.B., R.R.P., S.B.-Y., and I.R. wrote the manuscript. S.B.-Y. and I.R. managed the project.

## DECLARATION OF INTERESTS

The authors declare no competing interests.

Received: May 8, 2018

Revised: February 5, 2019

Accepted: February 13, 2019

Published: March 28, 2019

## REFERENCES

- Abby, S.S., and Rocha, E.P. (2012). The non-flagellar type III secretion system evolved from the bacterial flagellum and diversified into host-cell adapted systems. *PLoS Genet.* *8*, e1002983.
- Allen, R.D., and Baumann, P. (1971). Structure and arrangement of flagella in species of the genus *Beneckea* and *Photobacterium fischeri*. *J. Bacteriol.* *107*, 295–302.
- Argov, T., Rabinovich, L., Sigal, N., and Herskovits, A.A. (2017). An effective counterselection system for *Listeria monocytogenes* and its use to characterize the monocolin genomic region of strain 10403S. *Appl. Environ. Microbiol.* *83*, e02927-16.
- Baidya, A.K., Bhattacharya, S., Dubey, G.P., Mamou, G., and Ben-Yehuda, S. (2018). Bacterial nanotubes: a conduit for intercellular molecular trade. *Curr. Opin. Microbiol.* *42*, 1–6.
- Bejerano-Sagie, M., Oppenheimer-Shaanan, Y., Berlatzky, I., Rouvinski, A., Meyerovich, M., and Ben-Yehuda, S. (2006). A checkpoint protein that scans the chromosome for damage at the start of sporulation in *Bacillus subtilis*. *Cell* *125*, 679–690.
- Benomar, S., Ranava, D., Cárdenas, M.L., Trably, E., Rafrafi, Y., Ducret, A., Hamelin, J., Lojou, E., Steyer, J.P., and Giudici-Ortoni, M.T. (2015). Nutritional stress induces exchange of cell material and energetic coupling between bacterial species. *Nat. Commun.* *6*, 6283.
- Bron, S., Bolhuis, A., Tjalsma, H., Holsappel, S., Venema, G., and van Dijk, J.M. (1998). Protein secretion and possible roles for multiple signal peptidases for precursor processing in bacilli. *J. Biotechnol.* *64*, 3–13.
- Costa, T.R., Felisberto-Rodrigues, C., Meir, A., Prevost, M.S., Redzej, A., Trokter, M., and Waksman, G. (2015). Secretion systems in Gram-negative bacteria: structural and mechanistic insights. *Nat. Rev. Microbiol.* *13*, 343–359.
- Datsenko, K.A., and Wanner, B.L. (2000). One-step inactivation of chromosomal genes in *Escherichia coli* K-12 using PCR products. *Proc. Natl. Acad. Sci. U S A* *97*, 6640–6645.
- Diepold, A., and Armitage, J.P. (2015). Type III secretion systems: the bacterial flagellum and the injectisome. *Philos. Trans. R. Soc. Lond. B Biol. Sci.* *370*, 20150020.
- Diepold, A., and Wagner, S. (2014). Assembly of the bacterial type III secretion machinery. *FEMS Microbiol. Rev.* *38*, 802–822.
- Dietsche, T., Tesfazgi Mebrhatu, M., Brunner, M.J., Abrusci, P., Yan, J., Franz-Wachtel, M., Schärfe, C., Zilkenat, S., Grin, I., Galán, J.E., et al. (2016). Structural and functional characterization of the bacterial type III secretion export apparatus. *PLoS Pathog.* *12*, e1006071.
- Dubey, G.P., and Ben-Yehuda, S. (2011). Intercellular nanotubes mediate bacterial communication. *Cell* *144*, 590–600.
- Dubey, G.P., Malli Mohan, G.B., Dubrovsky, A., Amen, T., Tsipshtein, S., Rouvinski, A., Rosenberg, A., Kaganovich, D., Sherman, E., Medalia, O., and Ben-Yehuda, S. (2016). Architecture and characteristics of bacterial nanotubes. *Dev. Cell* *36*, 453–461.
- Fabiani, F.D., Renault, T.T., Peters, B., Dietsche, T., Gálvez, E.J.C., Guse, A., Freier, K., Charpentier, E., Strowig, T., Franz-Wachtel, M., et al. (2017). A flagellum-specific chaperone facilitates assembly of the core type III export apparatus of the bacterial flagellum. *PLoS Biol.* *15*, e2002267.
- Fukumura, T., Makino, F., Dietsche, T., Kinoshita, M., Kato, T., Wagner, S., Namba, K., Imada, K., and Minamino, T. (2017). Assembly and stoichiometry of the core structure of the bacterial flagellar type III export gate complex. *PLoS Biol.* *15*, e2002281.
- Geis, G., Suerbaum, S., Forsthoef, B., Leying, H., and Opferkuch, W. (1993). Ultrastructure and biochemical studies of the flagellar sheath of *Helicobacter pylori*. *J. Med. Microbiol.* *38*, 371–377.
- Gibson, D.G. (2011). Enzymatic assembly of overlapping DNA fragments. *Methods Enzymol.* *498*, 349–361.
- Guérout-Fleury, A.M., Frandsen, N., and Stragier, P. (1996). Plasmids for ectopic integration in *Bacillus subtilis*. *Gene* *180*, 57–61.
- Harwood, C.R., and Cutting, S.M. (1990). *Molecular biological methods for Bacillus* (Wiley).
- Hayes, C.S., Aoki, S.K., and Low, D.A. (2010). Bacterial contact-dependent delivery systems. *Annu. Rev. Genet.* *44*, 71–90.
- Hu, Y., Huang, H., Cheng, X., Shu, X., White, A.P., Stavrinides, J., Köster, W., Zhu, G., Zhao, Z., and Wang, Y. (2017). A global survey of bacterial type III secretion systems and their effectors. *Environ. Microbiol.* *19*, 3879–3895.
- Hueck, C.J. (1998). Type III protein secretion systems in bacterial pathogens of animals and plants. *Microbiol. Mol. Biol. Rev.* *62*, 379–433.
- Jones, L.J., Carballido-López, R., and Errington, J. (2001). Control of cell shape in bacteria: helical, actin-like filaments in *Bacillus subtilis*. *Cell* *104*, 913–922.
- Kearns, D.B., and Losick, R. (2003). Swarming motility in undomesticated *Bacillus subtilis*. *Mol. Microbiol.* *49*, 581–590.
- Kuhlen, L., Abrusci, P., Johnson, S., Gault, J., Deme, J., Caesar, J., Dietsche, T., Mebrhatu, M.T., Ganief, T., Macek, B., et al. (2018). Structure of the core of the type III secretion system export apparatus. *Nat. Struct. Mol. Biol.* *25*, 583–590.
- Lemon, K.P., and Grossman, A.D. (1998). Localization of bacterial DNA polymerase: evidence for a factory model of replication. *Science* *282*, 1516–1519.
- Li, X.T., Thomason, L.C., Sawitzke, J.A., Costantino, N., and Court, D.L. (2013). Positive and negative selection using the *tetA-sacB* cassette: recombineering and P1 transduction in *Escherichia coli*. *Nucleic Acids Res.* *41*, e204.
- McCaig, W.D., Koller, A., and Thanassi, D.G. (2013). Production of outer membrane vesicles and outer membrane tubes by *Francisella novicida*. *J. Bacteriol.* *195*, 1120–1132.
- McCarter, L.L. (2001). Polar flagellar motility of the *Vibrionaceae*. *Microbiol. Mol. Biol. Rev.* *65*, 445–462.
- Minamino, T., and Imada, K. (2015). The bacterial flagellar motor and its structural diversity. *Trends Microbiol.* *23*, 267–274.
- Morimoto, Y.V., Ito, M., Hiraoka, K.D., Che, Y.S., Bai, F., Kami-Ike, N., Namba, K., and Minamino, T. (2014). Assembly and stoichiometry of FlIF and FlhA in *Salmonella* flagellar basal body. *Mol. Microbiol.* *91*, 1214–1226.
- Moro, A., Sanchez, J.C., and Serguera, C. (1995). Transformation of *Bacillus megaterium* by electroporation. *Biotechnol. Tech.* *9*, 589–590.
- Pal, R.R., Baidya, A.K., Mamou, G., Bhattacharya, S., Socol, Y., Kobi, S., Katsowich, N., Ben-Yehuda, S., and Rosenshine, I. (2019). Pathogenic

- E. coli* extracts nutrients from infected host cells utilizing injectisome components. *Cell* 177, Published online March 28, 2019. <https://doi.org/10.1016/j.cell.2019.02.022>.
- Pallen, M.J., and Matzke, N.J. (2006). From The Origin of Species to the origin of bacterial flagella. *Nat. Rev. Microbiol.* 4, 784–790.
- Pande, S., Shitut, S., Freund, L., Westermann, M., Bertels, F., Colesie, C., Bischofs, I.B., and Kost, C. (2015). Metabolic cross-feeding via intercellular nanotubes among bacteria. *Nat. Commun.* 6, 6238.
- Ren, C.P., Beatson, S.A., Parkhill, J., and Pallen, M.J. (2005). The Flag-2 locus, an ancestral gene cluster, is potentially associated with a novel flagellar system from *Escherichia coli*. *J. Bacteriol.* 187, 1430–1440.
- Rosenberg, A., Sinai, L., Smith, Y., and Ben-Yehuda, S. (2012). Dynamic expression of the translational machinery during *Bacillus subtilis* life cycle at a single cell level. *PLoS ONE* 7, e41921.
- Rudner, D.Z., Pan, Q., and Losick, R.M. (2002). Evidence that subcellular localization of a bacterial membrane protein is achieved by diffusion and capture. *Proc. Natl. Acad. Sci. U S A* 99, 8701–8706.
- Snyder, L.A., Loman, N.J., Fütterer, K., and Pallen, M.J. (2009). Bacterial flagellar diversity and evolution: seek simplicity and distrust it? *Trends Microbiol.* 17, 1–5.
- Stempler, O., Baidya, A.K., Bhattacharya, S., Malli Mohan, G.B., Tzipilevich, E., Sinai, L., Mamou, G., and Ben-Yehuda, S. (2017). Interspecies nutrient extraction and toxin delivery between bacteria. *Nat. Commun.* 8, 315.
- Szklarczyk, D., Morris, J.H., Cook, H., Kuhn, M., Wyder, S., Simonovic, M., Santos, A., Doncheva, N.T., Roth, A., Bork, P., et al. (2017). The STRING database in 2017: quality-controlled protein-protein association networks, made broadly accessible. *Nucleic Acids Res.* 45 (D7), D362–D368.
- Thomason, L.C., Costantino, N., and Court, D.L. (2007). *E. coli* genome manipulation by P1 transduction. *Curr. Protoc. Mol. Biol.* Chapter 1, Unit 1.17.
- Tzipilevich, E., Habusha, M., and Ben-Yehuda, S. (2017). Acquisition of phage sensitivity by bacteria through exchange of phage receptors. *Cell* 168, 186–199.e12.
- von Mering, C., Jensen, L.J., Kuhn, M., Chaffron, S., Doerks, T., Krüger, B., Snel, B., and Bork, P. (2007). STRING 7—recent developments in the integration and prediction of protein interactions. *Nucleic Acids Res.* 35, D358–D362.
- Wei, X., Vassallo, C.N., Pathak, D.T., and Wall, D. (2014). *Myxobacteria* produce outer membrane-enclosed tubes in unstructured environments. *J. Bacteriol.* 196, 1807–1814.
- Youngman, P., Perkins, J.B., and Losick, R. (1984). Construction of a cloning site near one end of Tn917 into which foreign DNA may be inserted without affecting transposition in *Bacillus subtilis* or expression of the transposon-borne *erm* gene. *Plasmid* 12, 1–9.
- Yu, D., Ellis, H.M., Lee, E.C., Jenkins, N.A., Copeland, N.G., and Court, D.L. (2000). An efficient recombination system for chromosome engineering in *Escherichia coli*. *Proc. Natl. Acad. Sci. U S A* 97, 5978–5983.

## STAR★METHODS

### KEY RESOURCES TABLE

| REAGENT or RESOURCE                                                                             | SOURCE                                        | IDENTIFIER                             |
|-------------------------------------------------------------------------------------------------|-----------------------------------------------|----------------------------------------|
| <b>Antibodies</b>                                                                               |                                               |                                        |
| Polyclonal anti-HA antibodies (Rabbit)                                                          | Thermo Fisher Scientific                      | Cat#:71-5500;<br>RRID: AB_2533988      |
| Polyclonal anti-GFP antibodies (Rabbit)                                                         | Laboratory stock (Dubey and Ben-Yehuda, 2011) | NA                                     |
| 18 nm gold-conjugated IgG secondary antibody Goat anti-Rabbit.                                  | Jackson ImmunoResearch Laboratories           | Cat#: 111-215-144;<br>RRID: AB_2338017 |
| <b>Chemicals, Peptides, and Recombinant Proteins</b>                                            |                                               |                                        |
| Chloramphenicol                                                                                 | Sigma-Aldrich                                 | Cat#: C0378                            |
| Tetracycline                                                                                    | Sigma-Aldrich                                 | Cat#: 87128                            |
| Kanamycin                                                                                       | US Biological                                 | Cat#: K0010                            |
| Lincomycin                                                                                      | Sigma-Aldrich                                 | Cat#: 62143-5G                         |
| Erythromycin                                                                                    | Sigma-Aldrich                                 | Cat#: E0774                            |
| Spectinomycin                                                                                   | Sigma-Aldrich                                 | Cat#: S4014-5G                         |
| Ampicillin                                                                                      | Sigma-Aldrich                                 | Cat#: A9518-25G                        |
| IPTG (Isopropyl β-D-1-thiogalactopyranoside)                                                    | Sigma-Aldrich                                 | Cat#: I6758-5G                         |
| D-Xylose                                                                                        | Sigma-Aldrich                                 | Cat#: X1500-1KG                        |
| Sucrose                                                                                         | J.T.Baker                                     | Cat#: 4072-05                          |
| Polyethylene glycol 8000                                                                        | Promega                                       | Cat#: V3011                            |
| D-Sorbitol                                                                                      | Sigma-Aldrich                                 | Cat#: S6021                            |
| Paraformaldehyde                                                                                | Electron Microscopy Sciences                  | Cat#: 15710                            |
| Glutaraldehyde                                                                                  | Electron Microscopy Sciences                  | Cat#: 16020                            |
| Sodium Cacodylate Buffer (pH 7.4)                                                               | Electron Microscopy Sciences                  | Cat#: 11650                            |
| FM4-64                                                                                          | Molecular probes/ Thermo Fisher Scientific    | Cat#: T13320                           |
| <b>Critical Commercial Assays</b>                                                               |                                               |                                        |
| Q5 High-Fidelity DNA Polymerase                                                                 | NEW ENGLAND BioLabs                           | Cat#: M0491S                           |
| Gibson Assembly Master Mix                                                                      | NEW ENGLAND BioLabs                           | Cat#: E2611L                           |
| Quick Ligation Kit                                                                              | NEW ENGLAND BioLabs                           | Cat#: M2200S                           |
| RQ1 RNase-free DNase                                                                            | Promega                                       | Cat#: M6101                            |
| qScript cDNA synthesis kit                                                                      | Quanta Biosciences                            | Cat#: 95047-25                         |
| PerfeCTa SYBR Green FastMix                                                                     | Quanta Biosciences                            | Cat#: 95073-250                        |
| <b>Experimental Models: Organisms/Strains</b>                                                   |                                               |                                        |
| PY79 ( <i>B. subtilis</i> wild type)                                                            | Youngman et al., 1984                         | NA                                     |
| AR16 ( <i>amyE::P<sub>rmE</sub>-gfp-spec</i> )                                                  | Rosenberg et al., 2012                        | NA                                     |
| GD215 ( <i>Δhag::erm</i> )                                                                      | Dubey and Ben-Yehuda, 2011                    | NA                                     |
| GD110 ( <i>amyE::P<sub>hyper-spank</sub>-cat-spec</i> , pHB201/ <i>cat</i> , <i>erm</i> )       | Dubey and Ben-Yehuda, 2011                    | NA                                     |
| GD267 ( <i>Δhag::erm</i> , <i>amyE::P<sub>hyper-spank</sub>-cat-spec</i> )                      | Laboratory stock                              | NA                                     |
| GD268 ( <i>Δhag::erm</i> , <i>amyE::P<sub>hyper-spank</sub>-gfp-kan</i> )                       | Laboratory stock                              | NA                                     |
| SB463 ( <i>amyE::P<sub>hyper-spank</sub>-cat-spec</i> )                                         | Dubey and Ben-Yehuda, 2011                    | NA                                     |
| SB513 ( <i>amyE::P<sub>hyper-spank</sub>-gfp-kan</i> )                                          | Dubey and Ben-Yehuda, 2011                    | NA                                     |
| GB61 ( <i>ΔymdB::tet</i> )                                                                      | Dubey et al., 2016                            | NA                                     |
| GB168 ( <i>ΔymdB::tet</i> , <i>amyE::P<sub>hyper-spank</sub>-ymdB-spec</i> , <i>Δhag::erm</i> ) | Dubey et al., 2016                            | NA                                     |
| IB11 ( <i>Δmbl::erm</i> )                                                                       | Bejerano-Sagie et al., 2006                   | NA                                     |
| ET13 ( <i>amyE::P<sub>hyper-spank</sub>-yueB-yfp-spec</i> )                                     | Tzipilevich et al., 2017                      | NA                                     |

(Continued on next page)



**Continued**

| REAGENT or RESOURCE                                                                                                                                                             | SOURCE              | IDENTIFIER |
|---------------------------------------------------------------------------------------------------------------------------------------------------------------------------------|---------------------|------------|
| BDR524 ( <i>amyE::P<sub>xyIA</sub>-spoIVFB-gfp-cat</i> )                                                                                                                        | Rudner et al., 2002 | NA         |
| SH8 ( $\Delta$ <i>flgB-flfF::tet</i> , <i>P<sub>fla/che</sub>-fliG-cheD</i> )                                                                                                   | This study          | NA         |
| SH9 ( $\Delta$ <i>CORE (fliO-flhA)::tet</i> , <i>P<sub>fla/che</sub>-flhF-cheD</i> )                                                                                            | This study          | NA         |
| SH30 ( $\Delta$ <i>fliO-flhA::tet</i> , <i>P<sub>fla/che</sub>-flhF-cheD</i> , <i>amyE::P<sub>rmE</sub>-gfp-spec</i> )                                                          | This study          | NA         |
| SH31 ( <i>sacA::P<sub>fla/che</sub>-fliO-flhA-spec</i> )                                                                                                                        | This study          | NA         |
| SH33 ( $\Delta$ <i>fliO-flhA::tet</i> , <i>P<sub>fla/che</sub>-flhF-cheD</i> , <i>sacA::P<sub>fla/che</sub>-fliO-flhA-spec</i> )                                                | This study          | NA         |
| SH47 ( <i>flhA-gfp-kan</i> )                                                                                                                                                    | This study          | NA         |
| SH55 ( <i>flhA-gfp-kan</i> , $\Delta$ <i>ymdB::tet</i> , <i>amyE::P<sub>hyper-spank</sub>-ymdB-spec</i> , $\Delta$ <i>hag::erm</i> )                                            | This study          | NA         |
| SH79 ( <i>sacA::P<sub>hyper-spank</sub>-ymdB-kan</i> )                                                                                                                          | This study          | NA         |
| SH86 ( <i>amyE::P<sub>hyper-spank</sub>-fliP<sub>2xHA</sub>-spec</i> )                                                                                                          | This study          | NA         |
| SH93 ( <i>amyE::P<sub>hyper-spank</sub>-fliP<sub>2xHA</sub>-spec</i> , <i>sacA::P<sub>hyper-spank</sub>-ymdB-kan</i> )                                                          | This study          | NA         |
| SH103 ( $\Delta$ <i>fliO::tet</i> , <i>P<sub>fla/che</sub>-fliP-cheD</i> )                                                                                                      | This study          | NA         |
| SH104 ( $\Delta$ <i>fliP::tet</i> , <i>P<sub>fla/che</sub>-fliQ-cheD</i> )                                                                                                      | This study          | NA         |
| SH105 ( $\Delta$ <i>fliQ::tet</i> , <i>P<sub>fla/che</sub>-fliR-cheD</i> )                                                                                                      | This study          | NA         |
| SH106 ( $\Delta$ <i>fliR::tet</i> , <i>P<sub>fla/che</sub>-flhB-cheD</i> )                                                                                                      | This study          | NA         |
| SH107 ( $\Delta$ <i>flhB::tet</i> , <i>P<sub>fla/che</sub>-flhA-cheD</i> )                                                                                                      | This study          | NA         |
| SH108 ( $\Delta$ <i>flhA::tet</i> , <i>P<sub>fla/che</sub>-flhF-cheD</i> )                                                                                                      | This study          | NA         |
| SH110 ( <i>amyE::P<sub>hyper-spank</sub>-fliP<sub>2xHA</sub>-spec</i> , <i>sacA::P<sub>hyper-spank</sub>-ymdB-kan</i> , $\Delta$ <i>mbl::erm</i> )                              | This study          | NA         |
| SH115 [ <i>sacA::P<sub>fla/che</sub>-CORE-F<sub>Ec</sub> (fliOPQRflhBA)-spec</i> ]                                                                                              | This study          | NA         |
| SH116 [ $\Delta$ <i>fliO-flhA::tet</i> , <i>sacA::P<sub>fla/che</sub>-CORE-F<sub>Ec</sub> (fliOPQRflhBA)-spec</i> ]                                                             | This study          | NA         |
| SH150 ( <i>amyE::P<sub>hyper-spank</sub>-fliP<sub>2xHA</sub>-LOOP-spec</i> )                                                                                                    | This study          | NA         |
| SH151 ( <i>amyE::P<sub>hyper-spank</sub>-fliP<sub>2xHA</sub>-LOOP-spec</i> , <i>sacA::P<sub>hyper-spank</sub>-ymdB-kan</i> )                                                    | This study          | NA         |
| SH161 ( <i>amyE::P<sub>hyper-spank</sub>-fliP<sub>2xHA</sub>-LOOP-spec</i> , <i>sacA::P<sub>hyper-spank</sub>-ymdB-kan</i> , $\Delta$ <i>mbl::erm</i> )                         | This study          | NA         |
| SH169 [ <i>amyE::P<sub>hyper-spank</sub>-CORE-F<sub>Ec</sub> (fliOPQRflhBA)-spec</i> ]                                                                                          | This study          | NA         |
| SH170 [ $\Delta$ <i>fliO-flhA::tet</i> , <i>amyE::P<sub>hyper-spank</sub>-CORE-F<sub>Ec</sub> (fliOPQRflhBA)-spec</i> ]                                                         | This study          | NA         |
| SH177 ( $\Delta$ <i>fliI::tet</i> , <i>P<sub>fla/che</sub>-fliJ-cheD</i> )                                                                                                      | This study          | NA         |
| SH203 ( $\Delta$ <i>fliO::tet</i> , <i>P<sub>fla/che</sub>-fliP-cheD</i> , <i>sacA::P<sub>fla/che</sub>-fliO-spec</i> )                                                         | This study          | NA         |
| SH204 ( $\Delta$ <i>fliP::tet</i> , <i>P<sub>fla/che</sub>-fliQ-cheD</i> , <i>sacA::P<sub>fla/che</sub>-fliP-spec</i> )                                                         | This study          | NA         |
| SH205 ( $\Delta$ <i>fliQ::tet</i> , <i>P<sub>fla/che</sub>-fliR-cheD</i> , <i>sacA::P<sub>fla/che</sub>-fliQ-spec</i> )                                                         | This study          | NA         |
| SH206 ( $\Delta$ <i>fliR::tet</i> , <i>P<sub>fla/che</sub>-flhB-cheD</i> , <i>sacA::P<sub>fla/che</sub>-fliR-spec</i> )                                                         | This study          | NA         |
| SH207 ( $\Delta$ <i>flhB::tet</i> , <i>P<sub>fla/che</sub>-flhA-cheD</i> , <i>sacA::P<sub>fla/che</sub>-flhB-spec</i> )                                                         | This study          | NA         |
| SH208 ( $\Delta$ <i>flhA::tet</i> , <i>P<sub>fla/che</sub>-flhF-cheD</i> , <i>sacA::P<sub>fla/che</sub>-flhA-spec</i> )                                                         | This study          | NA         |
| SH209 [ $\Delta$ <i>fliO-flhA::tet</i> , <i>sacA::P<sub>fla/che</sub>-CORE-F<sub>Lm</sub> (fliPQRflhBA)-spec</i> ]                                                              | This study          | NA         |
| SH210 [ $\Delta$ <i>fliO-flhA::tet</i> , <i>sacA::P<sub>fla/che</sub>-CORE-F<sub>Bm</sub> (fliOPQRflhBA)-spec</i> ]                                                             | This study          | NA         |
| SH244 ( $\Delta$ <i>fliP::tet</i> , <i>P<sub>fla/che</sub>-fliQ-cheD</i> , <i>sacA::P<sub>fla/che</sub>-fliO-fliP-spec</i> )                                                    | This study          | NA         |
| SH245 ( $\Delta$ <i>fliP::tet</i> , <i>P<sub>fla/che</sub>-fliQ-cheD</i> , <i>sacA::P<sub>fla/che</sub>-fliO-fliP<sub>2xHA</sub>-spec</i> )                                     | This study          | NA         |
| SH247 ( $\Delta$ <i>fliP::tet</i> , <i>P<sub>fla/che</sub>-fliQ-cheD</i> , <i>sacA::P<sub>fla/che</sub>-fliO-fliP<sub>2xHA</sub>-spec</i> , $\Delta$ <i>mbl::erm</i> )          | This study          | NA         |
| SH255 ( <i>amyE::P<sub>hyper-spank</sub>-yueB-yfp-spec</i> , <i>sacA::P<sub>hyper-spank</sub>-ymdB-kan</i> )                                                                    | This study          | NA         |
| SH256 ( <i>amyE::P<sub>xyIA</sub>-spoIVFB-gfp-cat</i> , <i>sacA::P<sub>hyper-spank</sub>-ymdB-kan</i> )                                                                         | This study          | NA         |
| SH257 ( <i>amyE::P<sub>hyper-spank</sub>-yueB-yfp-spec</i> , <i>sacA::P<sub>hyper-spank</sub>-ymdB-kan</i> , $\Delta$ <i>mbl::erm</i> )                                         | This study          | NA         |
| SH258 ( <i>amyE::P<sub>xyIA</sub>-spoIVFB-gfp-cat</i> , <i>sacA::P<sub>hyper-spank</sub>-ymdB-kan</i> , $\Delta$ <i>mbl::erm</i> )                                              | This study          | NA         |
| SH12 ( $\Delta$ <i>flgB-flfF::tet</i> , <i>P<sub>fla/che</sub>-fliG-cheD</i> , <i>amyE::P<sub>hyper-spank</sub>-gfp-kan</i> )                                                   | This study          | NA         |
| SH13 ( $\Delta$ <i>fliO-flhA::tet</i> , <i>P<sub>fla/che</sub>-flhF-cheD</i> , <i>amyE::P<sub>hyper-spank</sub>-gfp-kan</i> )                                                   | This study          | NA         |
| SH41 ( $\Delta$ <i>fliO-flhA::tet</i> , <i>P<sub>fla/che</sub>-flhF-cheD</i> , <i>sacA::P<sub>fla/che</sub>-fliO-flhA-spec</i> , <i>amyE::P<sub>hyper-spank</sub>-gfp-kan</i> ) | This study          | NA         |
| SH119 ( $\Delta$ <i>fliO::tet</i> , <i>P<sub>fla/che</sub>-fliP-cheD</i> , <i>amyE::P<sub>hyper-spank</sub>-gfp-kan</i> )                                                       | This study          | NA         |

(Continued on next page)

**Continued**

| REAGENT or RESOURCE                                                                                                                                      | SOURCE     | IDENTIFIER |
|----------------------------------------------------------------------------------------------------------------------------------------------------------|------------|------------|
| SH120 ( $\Delta$ fliP::tet, P <sub>fliA/che</sub> -fliQ-cheD, amyE::P <sub>hyper-spank</sub> -gfp-kan)                                                   | This study | NA         |
| SH121 ( $\Delta$ fliQ::tet, P <sub>fliA/che</sub> -fliR-cheD, amyE::P <sub>hyper-spank</sub> -gfp-kan)                                                   | This study | NA         |
| SH122 ( $\Delta$ fliR::tet, P <sub>fliA/che</sub> -flhB-cheD, amyE::P <sub>hyper-spank</sub> -gfp-kan)                                                   | This study | NA         |
| SH123 ( $\Delta$ flhB::tet, P <sub>fliA/che</sub> -flhA-cheD, amyE::P <sub>hyper-spank</sub> -gfp-kan)                                                   | This study | NA         |
| SH124 ( $\Delta$ flhA::tet, P <sub>fliA/che</sub> -flhF-cheD, amyE::P <sub>hyper-spank</sub> -gfp-kan)                                                   | This study | NA         |
| SH131 [ $\Delta$ fliO-flhA::tet, sacA::P <sub>fliA/che</sub> -CORE-F <sub>Ec</sub> (fliOPQRflhBA)-spec, amyE::P <sub>hyper-spank</sub> -gfp-kan]         | This study | NA         |
| SH182 ( $\Delta$ fliI::tet, P <sub>fliA/che</sub> -fliJ-cheD, amyE::P <sub>hyper-spank</sub> -gfp-kan)                                                   | This study | NA         |
| SH213 ( $\Delta$ fliO::tet, P <sub>fliA/che</sub> -fliP-cheD, sacA::P <sub>fliA/che</sub> -fliO-spec, amyE::P <sub>hyper-spank</sub> -gfp-kan)           | This study | NA         |
| SH214 ( $\Delta$ fliP::tet, P <sub>fliA/che</sub> -fliQ-cheD, sacA::P <sub>fliA/che</sub> -fliP-spec, amyE::P <sub>hyper-spank</sub> -gfp-kan)           | This study | NA         |
| SH215 ( $\Delta$ fliQ::tet, P <sub>fliA/che</sub> -fliR-cheD, sacA::P <sub>fliA/che</sub> -fliQ-spec, amyE::P <sub>hyper-spank</sub> -gfp-kan)           | This study | NA         |
| SH216 ( $\Delta$ fliR::tet, P <sub>fliA/che</sub> -flhB-cheD, sacA::P <sub>fliA/che</sub> -fliR-spec, amyE::P <sub>hyper-spank</sub> -gfp-kan)           | This study | NA         |
| SH217 ( $\Delta$ flhB::tet, P <sub>fliA/che</sub> -flhA-cheD, sacA::P <sub>fliA/che</sub> -flhB-spec, amyE::P <sub>hyper-spank</sub> -gfp-kan)           | This study | NA         |
| SH218 ( $\Delta$ flhA::tet, P <sub>fliA/che</sub> -flhF-cheD, sacA::P <sub>fliA/che</sub> -flhA-spec, amyE::P <sub>hyper-spank</sub> -gfp-kan)           | This study | NA         |
| SH219 [ $\Delta$ fliO-flhA::tet, sacA::P <sub>fliA/che</sub> -CORE-F <sub>Lm</sub> (fliPQRflhBA)-spec, amyE::P <sub>hyper-spank</sub> -gfp-kan]          | This study | NA         |
| SH220 [ $\Delta$ fliO-flhA::tet, sacA::P <sub>fliA/che</sub> -CORE-F <sub>Bm</sub> (fliOPQRflhBA)-spec, amyE::P <sub>hyper-spank</sub> -gfp-kan]         | This study | NA         |
| SH248 ( $\Delta$ fliP::tet, P <sub>fliA/che</sub> -fliQ-cheD, sacA::P <sub>fliA/che</sub> -fliO-fliP-spec, amyE::P <sub>hyper-spank</sub> -gfp-kan)      | This study | NA         |
| SH16 ( $\Delta$ fliG-fliF::tet, P <sub>fliA/che</sub> -fliG-cheD, amyE::P <sub>hyper-spank</sub> -cat-spec)                                              | This study | NA         |
| SH17 ( $\Delta$ fliO-flhA::tet, P <sub>fliA/che</sub> -flhF-cheD, amyE::P <sub>hyper-spank</sub> -cat-spec)                                              | This study | NA         |
| SH58 ( $\Delta$ fliO-flhA::tet, P <sub>fliA/che</sub> -flhF-cheD, sacA::P <sub>fliA/che</sub> -fliO-flhA-spec, amyE::P <sub>hyper-spank</sub> -cat-spec) | This study | NA         |
| SH125 ( $\Delta$ fliO::tet, P <sub>fliA/che</sub> -fliP-cheD, amyE::P <sub>hyper-spank</sub> -cat-spec)                                                  | This study | NA         |
| SH126 ( $\Delta$ fliP::tet, P <sub>fliA/che</sub> -fliQ-cheD, amyE::P <sub>hyper-spank</sub> -cat-spec)                                                  | This study | NA         |
| SH127 ( $\Delta$ fliQ::tet, P <sub>fliA/che</sub> -fliR-cheD, amyE::P <sub>hyper-spank</sub> -cat-spec)                                                  | This study | NA         |
| SH128 ( $\Delta$ fliR::tet, P <sub>fliA/che</sub> -flhB-cheD, amyE::P <sub>hyper-spank</sub> -cat-spec)                                                  | This study | NA         |
| SH129 ( $\Delta$ flhB::tet, P <sub>fliA/che</sub> -flhA-cheD, amyE::P <sub>hyper-spank</sub> -cat-spec)                                                  | This study | NA         |
| SH130 ( $\Delta$ flhA::tet, P <sub>fliA/che</sub> -flhF-cheD, amyE::P <sub>hyper-spank</sub> -cat-spec)                                                  | This study | NA         |
| SH132 [ $\Delta$ fliO-flhA::tet, sacA::P <sub>fliA/che</sub> -CORE-F <sub>Ec</sub> (fliOPQRflhBA)-spec, amyE::P <sub>hyper-spank</sub> -cat-spec]        | This study | NA         |
| SH183 ( $\Delta$ fliI::tet, P <sub>fliA/che</sub> -fliJ-cheD, amyE::P <sub>hyper-spank</sub> -cat-spec)                                                  | This study | NA         |
| SH223 ( $\Delta$ fliO::tet, P <sub>fliA/che</sub> -fliP-cheD, sacA::P <sub>fliA/che</sub> -fliO-spec, amyE::P <sub>hyper-spank</sub> -cat-spec)          | This study | NA         |
| SH224 ( $\Delta$ fliP::tet, P <sub>fliA/che</sub> -fliQ-cheD, sacA::P <sub>fliA/che</sub> -fliP-spec, amyE::P <sub>hyper-spank</sub> -cat-spec)          | This study | NA         |
| SH225 ( $\Delta$ fliQ::tet, P <sub>fliA/che</sub> -fliR-cheD, sacA::P <sub>fliA/che</sub> -fliQ-spec, amyE::P <sub>hyper-spank</sub> -cat-spec)          | This study | NA         |
| SH226 ( $\Delta$ fliR::tet, P <sub>fliA/che</sub> -flhB-cheD, sacA::P <sub>fliA/che</sub> -fliR-spec, amyE::P <sub>hyper-spank</sub> -cat-spec)          | This study | NA         |
| SH227 ( $\Delta$ flhB::tet, P <sub>fliA/che</sub> -flhA-cheD, sacA::P <sub>fliA/che</sub> -flhB-spec, amyE::P <sub>hyper-spank</sub> -cat-spec)          | This study | NA         |
| SH228 ( $\Delta$ flhA::tet, P <sub>fliA/che</sub> -flhF-cheD, sacA::P <sub>fliA/che</sub> -flhA-spec, amyE::P <sub>hyper-spank</sub> -cat-spec)          | This study | NA         |

(Continued on next page)

**Continued**

| REAGENT or RESOURCE                                                                                                                                                       | SOURCE                                | IDENTIFIER |
|---------------------------------------------------------------------------------------------------------------------------------------------------------------------------|---------------------------------------|------------|
| SH229 [ $\Delta$ fliO-flhA::tet, sacA::P <sub>fliA/che</sub> -CORE-F <sub>Lm</sub> (fliPQRflhBA)-spec, amyE::P <sub>hyper-spank</sub> -cat-spec]                          | This study                            | NA         |
| SH230 [ $\Delta$ fliO-flhA::tet, sacA::P <sub>fliA/che</sub> -CORE-F <sub>Bm</sub> (fliOPQRflhBA)-spec, amyE::P <sub>hyper-spank</sub> -cat-spec]                         | This study                            | NA         |
| SH249 ( $\Delta$ fliP::tet, P <sub>fliA/che</sub> -fliQ-cheD, sacA::P <sub>fliA/che</sub> -fliO-fliP-spec, amyE::P <sub>hyper-spank</sub> -cat-spec)                      | This study                            | NA         |
| SH22 ( $\Delta$ figB-fliF::tet, P <sub>fliA/che</sub> -fliG-cheD, amyE::P <sub>hyper-spank</sub> -cat-spec, pHB201/cat, erm)                                              | This study                            | NA         |
| SH23( $\Delta$ fliO-flhA::tet, P <sub>fliA/che</sub> -flhF-cheD, amyE::P <sub>hyper-spank</sub> -cat-spec, pHB201/cat, erm)                                               | This study                            | NA         |
| SH62 ( $\Delta$ fliO-flhA::tet, P <sub>fliA/che</sub> -flhF-cheD, sacA::P <sub>fliA/che</sub> -fliO-flhA-spec, amyE::P <sub>hyper-spank</sub> -cat-spec, pHB201/cat, erm) | This study                            | NA         |
| SH134 ( $\Delta$ fliO::tet, P <sub>fliA/che</sub> -fliP-cheD, amyE::P <sub>hyper-spank</sub> -cat-spec, pHB201/cat, erm)                                                  | This study                            | NA         |
| SH135 ( $\Delta$ fliP::tet, P <sub>fliA/che</sub> -fliQ-cheD, amyE::P <sub>hyper-spank</sub> -cat-spec, pHB201/cat, erm)                                                  | This study                            | NA         |
| SH136 ( $\Delta$ fliQ::tet, P <sub>fliA/che</sub> -fliR-cheD, amyE::P <sub>hyper-spank</sub> -cat-spec, pHB201/cat, erm)                                                  | This study                            | NA         |
| SH137 ( $\Delta$ fliR::tet, P <sub>fliA/che</sub> -flhB-cheD, amyE::P <sub>hyper-spank</sub> -cat-spec, pHB201/cat, erm)                                                  | This study                            | NA         |
| SH138 ( $\Delta$ flhB::tet, P <sub>fliA/che</sub> -flhA-cheD, amyE::P <sub>hyper-spank</sub> -cat-spec, pHB201/cat, erm)                                                  | This study                            | NA         |
| SH139 ( $\Delta$ flhA::tet, P <sub>fliA/che</sub> -flhF-cheD, amyE::P <sub>hyper-spank</sub> -cat-spec, pHB201/cat, erm)                                                  | This study                            | NA         |
| SH181 ( $\Delta$ hag::erm, pHB201/cat, erm)                                                                                                                               | This study                            | NA         |
| SH185 ( $\Delta$ fliI::tet, P <sub>fliA/che</sub> -fliJ-cheD, amyE::P <sub>hyper-spank</sub> -cat-spec, pHB201/cat, erm)                                                  | This study                            | NA         |
| SH233 ( $\Delta$ fliO::tet, P <sub>fliA/che</sub> -fliP-cheD, sacA::P <sub>fliA/che</sub> -fliO-spec, amyE::P <sub>hyper-spank</sub> -cat-spec, pHB201/cat, erm)          | This study                            | NA         |
| SH234 ( $\Delta$ fliP::tet, P <sub>fliA/che</sub> -fliQ-cheD, sacA::P <sub>fliA/che</sub> -fliP-spec, amyE::P <sub>hyper-spank</sub> -cat-spe, pHB201/cat, erm)           | This study                            | NA         |
| SH235 ( $\Delta$ fliQ::tet, P <sub>fliA/che</sub> -fliR-cheD, sacA::P <sub>fliA/che</sub> -fliQ-spec, amyE::P <sub>hyper-spank</sub> -cat-spe, pHB201/cat, erm)           | This study                            | NA         |
| SH236 ( $\Delta$ fliR::tet, P <sub>fliA/che</sub> -flhB-cheD, sacA::P <sub>fliA/che</sub> -fliR-spec, amyE::P <sub>hyper-spank</sub> -cat-spe, pHB201/cat, erm)           | This study                            | NA         |
| SH237 ( $\Delta$ flhB::tet, P <sub>fliA/che</sub> -flhA-cheD, sacA::P <sub>fliA/che</sub> -flhB-spec, amyE::P <sub>hyper-spank</sub> -cat-spec, pHB201/cat, erm)          | This study                            | NA         |
| SH238 ( $\Delta$ flhA::tet, P <sub>fliA/che</sub> -flhF-cheD, sacA::P <sub>fliA/che</sub> -flhA-spec, amyE::P <sub>hyper-spank</sub> -cat-spec, pHB201/cat, erm)          | This study                            | NA         |
| SH239 [ $\Delta$ fliO-flhA::tet, sacA::P <sub>fliA/che</sub> -CORE-F <sub>Lm</sub> (fliPQRflhBA)-spec, amyE::P <sub>hyper-spank</sub> -cat-spec, pHB201/cat, erm]         | This study                            | NA         |
| SH240 [ $\Delta$ fliO-flhA::tet, sacA::P <sub>fliA/che</sub> -CORE-F <sub>Bm</sub> (fliOPQRflhBA)-spec, amyE::P <sub>hyper-spank</sub> -cat-spec, pHB201/cat, erm]        | This study                            | NA         |
| SH250 ( $\Delta$ fliP::tet, P <sub>fliA/che</sub> -fliQ-cheD, sacA::P <sub>fliA/che</sub> -fliO-fliP-spec, amyE::P <sub>hyper-spank</sub> -cat-spec, pHB201/cat, erm)     | This study                            | NA         |
| OS2 ( <i>Bacillus megaterium</i> wild type isolate)                                                                                                                       | <a href="#">Stempler et al., 2017</a> | NA         |
| <i>Bm</i> $\Delta$ CORE (fliO-flhA)                                                                                                                                       | This study                            | NA         |
| <i>Bm</i> $\Delta$ flagellin (hag)                                                                                                                                        | This study                            | NA         |
| <i>Escherichia coli</i> K-12 MG1655                                                                                                                                       | Laboratory stock                      | NA         |
| XTL634 (Template for tet::sacB cassette)                                                                                                                                  | <a href="#">Li et al., 2013</a>       | NA         |
| RP7802 [ <i>Escherichia coli</i> K-12 MG1655 $\Delta$ fliOPQR]                                                                                                            | This study                            | NA         |
| RP7809 [ <i>Escherichia coli</i> K-12 MG1655 $\Delta$ CORE (fliOPQRflhBA)]                                                                                                | This study                            | NA         |

(Continued on next page)



| <b>Continued</b>                                                                          |                                                                                                    |                |
|-------------------------------------------------------------------------------------------|----------------------------------------------------------------------------------------------------|----------------|
| REAGENT or RESOURCE                                                                       | SOURCE                                                                                             | IDENTIFIER     |
| <i>Ec</i> DY378 (1974) [W3110 $\lambda$ cI857, $\Delta$ (cro-bioA)]                       | Yu et al., 2000                                                                                    |                |
| SK2462 ( <i>Ec</i> DY378 $\Delta$ fliC::kan)                                              | This study                                                                                         | NA             |
| SK2468 [ <i>Ec</i> K-12 MG1655 $\Delta$ flagellin (fliC::kan)]                            | This study                                                                                         | NA             |
| <i>Listeria monocytogenes</i> 10403S                                                      | Kindly provided by Ran Nir-Paz (Hebrew U)                                                          | NA             |
| <i>Lm</i> 10403S $\Delta$ CORE (fliP-flhA)                                                | This study                                                                                         | NA             |
| <i>Lm</i> 10403S $\Delta$ flagellin (flaA)                                                | This study                                                                                         | NA             |
| Oligonucleotides                                                                          |                                                                                                    |                |
| Primers used in this study are listed in Table S3.                                        | All primers were designed during this study, and synthesized by Integrated DNA Technologies (IDT). | NA             |
| Recombinant DNA                                                                           |                                                                                                    |                |
| pDR111 ( <i>amyE</i> ::P <sub>hyper-spank</sub> -spec)                                    | Kindly provided by David Rudner (Harvard U)                                                        | NA             |
| pHB201 ( <i>cat</i> , <i>erm</i> )                                                        | Bron et al., 1998                                                                                  | NA             |
| pKL168 ( <i>gfp</i> -kan)                                                                 | Lemon and Grossman, 1998                                                                           | NA             |
| pKD46 ( $\lambda$ RED genes, Amp <sup>r</sup> )                                           | Datsenko and Wanner, 2000                                                                          | NA             |
| pRP7358 [P <sub>tac</sub> -CORE-F <sub>Ec</sub> (fliOPQRflhBA)]                           | Pal et al., 2019                                                                                   | NA             |
| pSH13 ( <i>flhA</i> - <i>gfp</i> -kan)                                                    | This study                                                                                         | NA             |
| pSH17 ( <i>amyE</i> ::P <sub>hyper-spank</sub> -fliP <sub>2xHA</sub> -spec)               | This study                                                                                         | NA             |
| pSH19 ( <i>amyE</i> ::P <sub>hyper-spank</sub> -fliP <sub>2xHA</sub> -LOOP-spec)          | This study                                                                                         | NA             |
| pSH21 [ <i>amyE</i> ::P <sub>hyper-spank</sub> -CORE-F <sub>Ec</sub> (fliOPQRflhBA)-spec] | This study                                                                                         | NA             |
| pLR16- Phes                                                                               | Kindly provided by Anat Herskovits (Tel Aviv U) (Argov et al., 2017)                               | NA             |
| pLR16-AB1                                                                                 | This study                                                                                         | NA             |
| pSH22 (pLR16- <i>Lm</i> <i>flaA</i> int)                                                  | This study                                                                                         | NA             |
| pSH23 (pDG1514- <i>Bm</i> <i>hag</i> int)                                                 | This study                                                                                         | NA             |
| Other                                                                                     |                                                                                                    |                |
| Carbon film on 300 square mesh copper grids                                               | Electron Microscopy Sciences                                                                       | Cat#: CF300-Cu |
| Lysing Matrix B Bulk                                                                      | MP Biomedicals                                                                                     | Cat#: 6540-428 |

## CONTACT FOR REAGENT AND RESOURCE SHARING

Further information and requests for resources and reagents should be directed to and will be fulfilled by the Lead Contact, Sigal Ben-Yehuda (sigalb@ekmd.huji.ac.il).

## EXPERIMENTAL MODEL AND SUBJECT DETAILS

### Details on bacterial strain construction

*Bs* strains are derivatives of the wild-type strain PY79, *Bm* is a wild-type soil isolate (OS2), *Ec* strains are derivatives of the wild-type strain K-12 MG1655, *Lm* strains are derivatives of the wild-type strain 10403S. Bacterial strains and plasmids are listed in Key resources table, and primers are listed in Table S3.

For gene replacement strategy in *Bs*, indicated primer pairs (P1-P4; Table S3) were used to amplify the flanking genomic regions of the corresponding gene. The *fla/che* promoter region was amplified using the primers P<sub>flgB</sub> 1-2. PCR products were used for Gibson assembly (NEB, USA), together with the respective antibiotic resistance gene (Guérout-Fleury et al., 1996) The resultant product was used to transform PY79 to obtain the mutant allele.

**SH8** ( $\Delta$ flgB-fliF::tet, P<sub>fla/che</sub>-fliG-cheD) was constructed using Gibson assembly kit (NEB, USA) utilizing primers flgB-fliF KO P1-P4 and P<sub>flgB</sub> 1-2. **SH9** ( $\Delta$ fliO-flhA::tet, P<sub>fla/che</sub>-flhF-cheD) was constructed using Gibson assembly kit (NEB, USA) utilizing primers CORE KO P1-P4 and P<sub>flgB</sub> 1-2. **SH12** ( $\Delta$ flgB-fliF::tet, P<sub>fla/che</sub>-fliG-cheD, amyE::P<sub>hyper-spank</sub>-gfp-kan) was constructed by transforming SH8 with genomic DNA (gDNA) from strain SB513. **SH13** ( $\Delta$ fliO-flhA::tet, P<sub>fla/che</sub>-flhF-cheD, amyE::P<sub>hyper-spank</sub>-gfp-kan) was constructed by transforming SH9 with gDNA from strain SB513. **SH16** ( $\Delta$ flgB-fliF::tet, P<sub>fla/che</sub>-fliG-cheD, amyE::P<sub>hyper-spank</sub>-cat-spec) was constructed by transforming SH8 with gDNA from strain SB463. **SH17** ( $\Delta$ fliO-flhA::tet, P<sub>fla/che</sub>-flhF-cheD, amyE::P<sub>hyper-spank</sub>-cat-spec) was

constructed by transforming SH9 with gDNA from strain SB463. **SH22** ( $\Delta flgB$ -*fliF*::*tet*,  $P_{fla/che}$ -*fliG*-*cheD*, *amyE*:: $P_{hyper-spank}$ -*cat-spec*, pHB201/*cat*, *erm*) was constructed by transforming SH8 with pHB201. **SH23** ( $\Delta fliO$ -*flhA*::*tet*,  $P_{fla/che}$ -*flhF*-*cheD*, *amyE*:: $P_{hyper-spank}$ -*cat-spec*, pHB201/*cat*, *erm*) was constructed by transforming SH9 with pHB201. **SH30** ( $\Delta fliO$ -*flhA*::*tet*,  $P_{fla/che}$ -*flhF*-*cheD*, *amyE*:: $P_{rmE}$ -*gfp-spec*) was constructed by transforming gDNA SH9 with from strain AR16. **SH31** (*sacA*:: $P_{fla/che}$ -*fliO*-*flhA-spec*) was constructed using Gibson assembly kit (NEB, USA) utilizing primers *sacA* P1-P4, *Bs* CORE comp1-2 and Comp  $P_{flgB}$  1-2. **SH33** ( $\Delta fliO$ -*flhA*::*tet*,  $P_{fla/che}$ -*flhF*-*cheD*, *sacA*:: $P_{fla/che}$ -*fliO*-*flhA-spec*) was constructed by transforming SH9 with gDNA from strain SH31. **SH41** ( $\Delta fliO$ -*flhA*::*tet*,  $P_{fla/che}$ -*flhF*-*cheD*, *sacA*:: $P_{fla/che}$ -*fliO*-*flhA-spec*, *amyE*:: $P_{hyper-spank}$ -*gfp-kan*) was constructed by transforming SH33 with gDNA from strain SB513. **SH47** (*flhA*-*gfp-kan*) was constructed by transforming PY79 with pSH13. **SH55** (*flhA*-*gfp-kan*,  $\Delta ymdB$ ::*tet*, *amyE*:: $P_{hyper-spank}$ -*ymdB-spec*,  $\Delta hag$ ::*erm*) was constructed by transforming GB168 with gDNA from strain SH47. **SH58** ( $\Delta fliO$ -*flhA*::*tet*,  $P_{fla/che}$ -*flhF*-*cheD*, *sacA*:: $P_{fla/che}$ -*fliO*-*flhA-spec*, *amyE*:: $P_{hyper-spank}$ -*cat-spec*) was constructed by transforming SH33 with gDNA from strain SB463. **SH62** ( $\Delta fliO$ -*flhA*::*tet*,  $P_{fla/che}$ -*flhF*-*cheD*, *sacA*:: $P_{fla/che}$ -*fliO*-*flhA-spec*, *amyE*:: $P_{hyper-spank}$ -*cat-spec*, pHB201/*cat*, *erm*) was constructed by transforming SH58 with pHB201. **SH79** (*sacA*:: $P_{hyper-spank}$ -*ymdB-kan*) was constructed using Gibson assembly kit (NEB, USA) utilizing primers *sacA* P1-P4 and Comp  $P_{HS1-ymdB}$  R.  $P_{hyper-spank}$ -*ymdB* was amplified from GB168 gDNA using Comp  $P_{HS1-ymdB}$  R primers. **SH86** (*amyE*:: $P_{hyper-spank}$ -*fliP*<sub>2xHA</sub>-*spec*) was constructed by transforming PY79 with pSH17. **SH93** (*amyE*:: $P_{hyper-spank}$ -*fliP*<sub>2xHA</sub>-*spec*, *sacA*:: $P_{hyper-spank}$ -*ymdB-kan*) was constructed by transforming SH79 with gDNA from strain SH86. **SH96** (*flhA*-*gfp-kan*, *amyE*:: $P_{hag}$ -*hag*<sup>T209C</sup>-*spec*) was constructed by transforming DS1895 with gDNA from strain SH47. **SH103** ( $\Delta fliO$ ::*tet*,  $P_{fla/che}$ -*fliP*-*cheD*) was constructed using Gibson assembly kit (NEB, USA) utilizing primers *fliO* KO P1-P4 and  $P_{flgB}$  1-2. **SH104** ( $\Delta fliP$ ::*tet*,  $P_{fla/che}$ -*fliQ*-*cheD*) was constructed using Gibson assembly kit (NEB, USA) utilizing primers *fliP* KO P1-P4 and  $P_{flgB}$  1-2. **SH105** ( $\Delta fliQ$ ::*tet*,  $P_{fla/che}$ -*fliR*-*cheD*) was constructed using Gibson assembly kit (NEB, USA) utilizing primers *fliQ* KO P1-P4 and  $P_{flgB}$  1-2. **SH106** ( $\Delta fliR$ ::*tet*,  $P_{fla/che}$ -*flhB*-*cheD*) was constructed using Gibson assembly kit (NEB, USA) utilizing primers *fliR* KO P1-P4 and  $P_{flgB}$  1-2. **SH107** ( $\Delta flhB$ ::*tet*,  $P_{fla/che}$ -*flhA*-*cheD*) was constructed using Gibson assembly kit (NEB, USA) utilizing primers *flhB* KO P1-P4 and  $P_{flgB}$  1-2. **SH108** ( $\Delta flhA$ ::*tet*,  $P_{fla/che}$ -*flhF*-*cheD*) was constructed using Gibson assembly kit (NEB, USA) utilizing primers *flhA* KO P1-P4 and  $P_{flgB}$  1-2. **SH110** (*amyE*:: $P_{hyper-spank}$ -*fliP*<sub>2xHA</sub>-*spec*, *sacA*:: $P_{hyper-spank}$ -*ymdB-kan*,  $\Delta mbl$ ::*erm*) was constructed by transforming SH93 with gDNA from strain IB11. **SH115** [*sacA*:: $P_{fla/che}$ -*CORE-F<sub>Ec</sub>* (*fliOPQRflhBA*)-*spec*] was constructed using Gibson assembly kit (NEB, USA) utilizing primers *sacA* P1-P4, *Ec* CORE comp 1-2 and Comp  $P_{flgB}$  1-2a. *CORE-F<sub>Ec</sub>* (*fliOPQRflhBA*) was amplified from pRP7358 using primers *Ec* CORE comp 1-2. **SH116** [ $\Delta fliO$ -*flhA*::*tet*, *sacA*:: $P_{fla/che}$ -*CORE-F<sub>Ec</sub>* (*fliOPQRflhBA*)-*spec*] was constructed by transforming SH9 with gDNA from strain SH115. **SH119** ( $\Delta fliO$ ::*tet*,  $P_{fla/che}$ -*fliP*-*cheD*, *amyE*:: $P_{hyper-spank}$ -*gfp-kan*) was constructed by transforming SH103 with gDNA from strain SB513. **SH120** ( $\Delta fliP$ ::*tet*,  $P_{fla/che}$ -*fliQ*-*cheD*, *amyE*:: $P_{hyper-spank}$ -*gfp-kan*) was constructed by transforming SH104 with gDNA from strain SB513. **SH121** ( $\Delta fliQ$ ::*tet*,  $P_{fla/che}$ -*fliR*-*cheD*, *amyE*:: $P_{hyper-spank}$ -*gfp-kan*) was constructed by transforming SH105 with gDNA from strain SB513. **SH122** ( $\Delta fliR$ ::*tet*,  $P_{fla/che}$ -*flhB*-*cheD*, *amyE*:: $P_{hyper-spank}$ -*gfp-kan*) was constructed by transforming SH106 with gDNA from strain SB513. **SH123** ( $\Delta flhB$ ::*tet*,  $P_{fla/che}$ -*flhA*-*cheD*, *amyE*:: $P_{hyper-spank}$ -*gfp-kan*) was constructed by transforming SH107 with gDNA from strain SB513. **SH124** ( $\Delta flhA$ ::*tet*,  $P_{fla/che}$ -*flhF*-*cheD*, *amyE*:: $P_{hyper-spank}$ -*gfp-kan*) was constructed by transforming SH108 with gDNA from strain SB513. **SH125** ( $\Delta fliO$ ::*tet*,  $P_{fla/che}$ -*fliP*-*cheD*, *amyE*:: $P_{hyper-spank}$ -*cat-spec*) was constructed by transforming SH103 with gDNA from strain SB463. **SH126** ( $\Delta fliP$ ::*tet*,  $P_{fla/che}$ -*fliQ*-*cheD*, *amyE*:: $P_{hyper-spank}$ -*cat-spec*) was constructed by transforming SH104 with gDNA from strain SB463. **SH127** ( $\Delta fliQ$ ::*tet*,  $P_{fla/che}$ -*fliR*-*cheD*, *amyE*:: $P_{hyper-spank}$ -*cat-spec*) was constructed by transforming SH105 with gDNA from strain SB463. **SH128** ( $\Delta fliR$ ::*tet*,  $P_{fla/che}$ -*flhB*-*cheD*, *amyE*:: $P_{hyper-spank}$ -*cat-spec*) was constructed by transforming SH106 with gDNA from strain SB463. **SH129** ( $\Delta flhB$ ::*tet*,  $P_{fla/che}$ -*flhA*-*cheD*, *amyE*:: $P_{hyper-spank}$ -*cat-spec*) was constructed by transforming SH107 with gDNA from strain SB463. **SH130** ( $\Delta flhA$ ::*tet*,  $P_{fla/che}$ -*flhF*-*cheD*, *amyE*:: $P_{hyper-spank}$ -*cat-spec*) was constructed by transforming SH108 with gDNA from strain SB463. **SH131** [ $\Delta fliO$ -*flhA*::*tet*, *sacA*:: $P_{fla/che}$ -*CORE-F<sub>Ec</sub>* (*fliOPQRflhBA*)-*spec*, *amyE*:: $P_{hyper-spank}$ -*gfp-kan*] was constructed by transforming SH116 with gDNA from strain SB513. **SH132** [ $\Delta fliO$ -*flhA*::*tet*, *sacA*:: $P_{fla/che}$ -*CORE-F<sub>Ec</sub>* (*fliOPQRflhBA*)-*spec*, *amyE*:: $P_{hyper-spank}$ -*cat-spec*] was constructed by transforming SH116 with gDNA from strain SB463. **SH134** ( $\Delta fliO$ ::*tet*,  $P_{fla/che}$ -*fliP*-*cheD*, *amyE*:: $P_{hyper-spank}$ -*cat-spec*) was constructed by transforming SH125 with pHB201. **SH135** ( $\Delta fliP$ ::*tet*,  $P_{fla/che}$ -*fliQ*-*cheD*, *amyE*:: $P_{hyper-spank}$ -*cat-spec*) was constructed by transforming SH126 with pHB201. **SH136** ( $\Delta fliQ$ ::*tet*,  $P_{fla/che}$ -*fliR*-*cheD*, *amyE*:: $P_{hyper-spank}$ -*cat-spec*) was constructed by transforming SH127 with pHB201. **SH137** ( $\Delta fliR$ ::*tet*,  $P_{fla/che}$ -*flhB*-*cheD*, *amyE*:: $P_{hyper-spank}$ -*cat-spec*) was constructed by transforming SH128 with pHB201. **SH138** ( $\Delta flhB$ ::*tet*,  $P_{fla/che}$ -*flhA*-*cheD*, *amyE*:: $P_{hyper-spank}$ -*cat-spec*) was constructed by transforming SH129 with pHB201. **SH139** ( $\Delta flhA$ ::*tet*,  $P_{fla/che}$ -*flhF*-*cheD*, *amyE*:: $P_{hyper-spank}$ -*cat-spec*) was constructed by transforming SH130 with pHB201. **SH150** (*amyE*:: $P_{hyper-spank}$ -*fliP*<sub>2xHA-LOOP</sub>-*spec*) was constructed by transforming PY79 with pSH19. **SH151** (*amyE*:: $P_{hyper-spank}$ -*fliP*<sub>2xHA-LOOP</sub>-*spec*, *sacA*:: $P_{hyper-spank}$ -*ymdB-kan*) was constructed by transforming SH79 with gDNA from strain SH150. **SH161** (*amyE*:: $P_{hyper-spank}$ -*fliP*<sub>2xHA-LOOP</sub>-*spec*, *sacA*:: $P_{hyper-spank}$ -*ymdB-kan*,  $\Delta mbl$ ::*erm*) was constructed by transforming SH150 with gDNA from strain IB11. **SH169** [*amyE*:: $P_{hyper-spank}$ -*CORE-F<sub>Ec</sub>* (*fliOPQRflhBA*)-*spec*] was constructed by transforming PY79 with pSH21. **SH170** [ $\Delta fliO$ -*flhA*::*tet*, *amyE*:: $P_{hyper-spank}$ -*CORE-F<sub>Ec</sub>* (*fliOPQRflhBA*)-*spec*] was constructed by transforming SH9 with gDNA from strain SH169. **SH177** ( $\Delta flil$ ::*tet*,  $P_{fla/che}$ -*fliJ*-*cheD*) was constructed using Gibson assembly kit (NEB, USA) utilizing primers *fliI* KO P1-P4 and  $P_{flgB}$  1-2. **SH181** ( $\Delta hag$ ::*erm*, pHB201/*cat*, *erm*) was constructed by transforming GD215 with pHB201. **SH182** ( $\Delta flil$ ::*tet*,  $P_{fla/che}$ -*fliJ*-*cheD*, *amyE*:: $P_{hyper-spank}$ -*gfp-kan*) was constructed by transforming SH177 with gDNA from strain SB513. **SH183** ( $\Delta flil$ ::*tet*,  $P_{fla/che}$ -*fliJ*-*cheD*, *amyE*:: $P_{hyper-spank}$ -*cat-spec*) was constructed by transforming SH177 with gDNA from strain SB463. **SH185** ( $\Delta flil$ ::*tet*,  $P_{fla/che}$ -*fliJ*-*cheD*, *amyE*:: $P_{hyper-spank}$ -*cat-spec*, pHB201/*cat*, *erm*) was constructed by transforming SH183 with pHB201. **SH203** ( $\Delta fliO$ ::*tet*,  $P_{fla/che}$ -*fliP*-*cheD*, *sacA*:: $P_{fla/che}$ -*fliO-spec*) was constructed by transforming SH103 with complementation

construct generated using Gibson assembly kit (NEB, USA) utilizing primers *sacA* P1-P4, *fliO* comp1-2 and Comp  $P_{flgB}$ 1-R. **SH204** ( $\Delta fliP::tet$ ,  $P_{fla/che-fliQ-cheD}$ ,  $sacA::P_{fla/che-fliP-spec}$ ) was constructed by transforming SH104 with complementation construct generated using Gibson assembly kit (NEB, USA) utilizing primers *sacA* P1-P4, *fliP* comp1-2 and Comp  $P_{flgB}$ 1-R. **SH205** ( $\Delta fliQ::tet$ ,  $P_{fla/che-fliR-cheD}$ ,  $sacA::P_{fla/che-fliQ-spec}$ ) was constructed by transforming SH105 with complementation construct generated using Gibson assembly kit (NEB, USA) utilizing primers *sacA* P1-P4, *fliQ* comp1-2 and Comp  $P_{flgB}$ 1-R. **SH206** ( $\Delta fliR::tet$ ,  $P_{fla/che-flhB-cheD}$ ,  $sacA::P_{fla/che-fliR-spec}$ ) was constructed by transforming SH106 with complementation construct generated using Gibson assembly kit (NEB, USA) utilizing primers *sacA* P1-P4, *fliR* comp1-2 and Comp  $P_{flgB}$ 1-R. **SH207** ( $\Delta flhB::tet$ ,  $P_{fla/che-flhA-cheD}$ ,  $sacA::P_{fla/che-flhB-spec}$ ) was constructed by transforming SH107 with complementation construct generated using Gibson assembly kit (NEB, USA) utilizing primers *sacA* P1-P4, *flhB* comp1-2 and Comp  $P_{flgB}$ 1-R. **SH208** ( $\Delta flhA::tet$ ,  $P_{fla/che-flhF-cheD}$ ,  $sacA::P_{fla/che-flhA-spec}$ ) was constructed by transforming SH108 with complementation construct generated using Gibson assembly kit (NEB, USA) utilizing primers *sacA* P1-P4, *flhA* comp1-2 and Comp  $P_{flgB}$ 1-R. **SH209** [ $\Delta fliO-flhA::tet$ ,  $sacA::P_{fla/che-CORE-F_{Lm}}$  (*fliPQRflhBA*)-spec] was constructed by transforming SH9 with complementation construct generated using Gibson assembly kit (NEB, USA) utilizing primers *sacA* P1-P4, *Lm CORE* comp1-2 and Comp  $P_{flgB}$ 1-R. *CORE-F<sub>Lm</sub>* (*fliPQRflhBA*) was amplified from *Lm* (10403S) gDNA using primers *Lm CORE* comp 1-2. **SH210** [ $\Delta fliO-flhA::tet$ ,  $sacA::P_{fla/che-CORE-F_{Bm}}$  (*fliOPQRflhBA*)-spec] was constructed by transforming SH9 with complementation construct generated using Gibson assembly kit (NEB, USA) utilizing primers *sacA* P1-P4, *Bm CORE* comp1-2 and Comp  $P_{flgB}$ 1-R. *CORE-F<sub>Bm</sub>* (*fliOPQRflhBA*) was amplified from *Bm* (OS2) gDNA using primers *Bm CORE* comp 1-2. **SH213** ( $\Delta fliO::tet$ ,  $P_{fla/che-fliP-cheD}$ ,  $sacA::P_{fla/che-fliO-spec}$ , *amyE::P<sub>hyper-spank</sub>-gfp-kan*) was constructed by transforming SH203 with gDNA from strain SB513. **SH214** ( $\Delta fliP::tet$ ,  $P_{fla/che-fliQ-cheD}$ ,  $sacA::P_{fla/che-fliP-spec}$ , *amyE::P<sub>hyper-spank</sub>-gfp-kan*) was constructed by transforming SH204 with gDNA from strain SB513. **SH215** ( $\Delta fliQ::tet$ ,  $P_{fla/che-fliR-cheD}$ ,  $sacA::P_{fla/che-fliQ-spec}$ , *amyE::P<sub>hyper-spank</sub>-gfp-kan*) was constructed by transforming SH205 with gDNA from strain SB513. **SH216** ( $\Delta fliR::tet$ ,  $P_{fla/che-flhB-cheD}$ ,  $sacA::P_{fla/che-fliR-spec}$ , *amyE::P<sub>hyper-spank</sub>-gfp-kan*) was constructed by transforming SH206 with gDNA from strain SB513. **SH217** ( $\Delta flhB::tet$ ,  $P_{fla/che-flhA-cheD}$ ,  $sacA::P_{fla/che-flhB-spec}$ , *amyE::P<sub>hyper-spank</sub>-gfp-kan*) was constructed by transforming SH207 with gDNA from strain SB513. **SH218** ( $\Delta flhA::tet$ ,  $P_{fla/che-flhF-cheD}$ ,  $sacA::P_{fla/che-flhA-spec}$ , *amyE::P<sub>hyper-spank</sub>-gfp-kan*) was constructed by transforming SH208 with gDNA from strain SB513. **SH219** [ $\Delta fliO-flhA::tet$ ,  $sacA::P_{fla/che-CORE-F_{Lm}}$  (*fliPQRflhBA*)-spec, *amyE::P<sub>hyper-spank</sub>-gfp-kan*] was constructed by transforming SH209 with gDNA from strain SB513. **SH220** [ $\Delta fliO-flhA::tet$ ,  $sacA::P_{fla/che-CORE-F_{Bm}}$  (*fliOPQRflhBA*)-spec, *amyE::P<sub>hyper-spank</sub>-gfp-kan*] was constructed by transforming SH210 with gDNA from strain SB513. **SH223** ( $\Delta fliO::tet$ ,  $P_{fla/che-fliP-cheD}$ ,  $sacA::P_{fla/che-fliO-spec}$ , *amyE::P<sub>hyper-spank</sub>-cat-spec*) was constructed by transforming SH203 with gDNA from strain SB463. **SH224** ( $\Delta fliP::tet$ ,  $P_{fla/che-fliQ-cheD}$ ,  $sacA::P_{fla/che-fliP-spec}$ , *amyE::P<sub>hyper-spank</sub>-cat-spec*) was constructed by transforming SH204 with gDNA from strain SB463. **SH225** ( $\Delta fliQ::tet$ ,  $P_{fla/che-fliR-cheD}$ ,  $sacA::P_{fla/che-fliQ-spec}$ , *amyE::P<sub>hyper-spank</sub>-cat-spec*) was constructed by transforming SH205 with gDNA from strain SB463. **SH226** ( $\Delta fliR::tet$ ,  $P_{fla/che-flhB-cheD}$ ,  $sacA::P_{fla/che-fliR-spec}$ , *amyE::P<sub>hyper-spank</sub>-cat-spec*) was constructed by transforming SH206 with gDNA from strain SB463. **SH227** ( $\Delta flhB::tet$ ,  $P_{fla/che-flhA-cheD}$ ,  $sacA::P_{fla/che-flhB-spec}$ , *amyE::P<sub>hyper-spank</sub>-cat-spec*) was constructed by transforming SH207 with gDNA from strain SB463. **SH228** ( $\Delta flhA::tet$ ,  $P_{fla/che-flhF-cheD}$ ,  $sacA::P_{fla/che-flhA-spec}$ , *amyE::P<sub>hyper-spank</sub>-cat-spec*) was constructed by transforming SH208 with gDNA from strain SB463. **SH229** [ $\Delta fliO-flhA::tet$ ,  $sacA::P_{fla/che-CORE-F_{Lm}}$  (*fliPQRflhBA*)-spec, *amyE::P<sub>hyper-spank</sub>-cat-spec*] was constructed by transforming SH209 with gDNA from strain SB463. **SH230** [ $\Delta fliO-flhA::tet$ ,  $sacA::P_{fla/che-CORE-F_{Bm}}$  (*fliOPQRflhBA*)-spec, *amyE::P<sub>hyper-spank</sub>-cat-spec*] was constructed by transforming SH210 with gDNA from strain SB463. **SH233** ( $\Delta fliO::tet$ ,  $P_{fla/che-fliP-cheD}$ ,  $sacA::P_{fla/che-fliO-spec}$ , *amyE::P<sub>hyper-spank</sub>-cat-spec*, pHB201/*cat*, *erm*) was constructed by transforming SH223 with pHB201. **SH234** ( $\Delta fliP::tet$ ,  $P_{fla/che-fliQ-cheD}$ ,  $sacA::P_{fla/che-fliP-spec}$ , *amyE::P<sub>hyper-spank</sub>-cat-spec*, pHB201/*cat*, *erm*) was constructed by transforming SH224 with pHB201. **SH235** ( $\Delta fliQ::tet$ ,  $P_{fla/che-fliR-cheD}$ ,  $sacA::P_{fla/che-fliQ-spec}$ , *amyE::P<sub>hyper-spank</sub>-cat-spec*, pHB201/*cat*, *erm*) was constructed by transforming SH225 with pHB201. **SH236** ( $\Delta fliR::tet$ ,  $P_{fla/che-flhB-cheD}$ ,  $sacA::P_{fla/che-fliR-spec}$ , *amyE::P<sub>hyper-spank</sub>-cat-spec*, pHB201/*cat*, *erm*) was constructed by transforming SH226 with pHB201. **SH237** ( $\Delta flhB::tet$ ,  $P_{fla/che-flhA-cheD}$ ,  $sacA::P_{fla/che-flhB-spec}$ , *amyE::P<sub>hyper-spank</sub>-cat-spec*, pHB201/*cat*, *erm*) was constructed by transforming SH227 with pHB201. **SH238** ( $\Delta flhA::tet$ ,  $P_{fla/che-flhF-cheD}$ ,  $sacA::P_{fla/che-flhA-spec}$ , *amyE::P<sub>hyper-spank</sub>-cat-spec*, pHB201/*cat*, *erm*) was constructed by transforming SH228 with pHB201. **SH239** [ $\Delta fliO-flhA::tet$ ,  $sacA::P_{fla/che-CORE-F_{Lm}}$  (*fliPQRflhBA*)-spec, *amyE::P<sub>hyper-spank</sub>-cat-spec*, pHB201/*cat*, *erm*] was constructed by transforming SH229 with pHB201. **SH240** [ $\Delta fliO-flhA::tet$ ,  $sacA::P_{fla/che-CORE-F_{Bm}}$  (*fliOPQRflhBA*)-spec, *amyE::P<sub>hyper-spank</sub>-cat-spec*, pHB201/*cat*, *erm*] was constructed by transforming SH230 with pHB201. **SH244** ( $\Delta fliP::tet$ ,  $P_{fla/che-fliQ-cheD}$ ,  $sacA::P_{fla/che-fliO-fliP-spec}$ ) was constructed by transforming SH104 with complementation construct generated using Gibson assembly kit (NEB, USA) utilizing primers *sacA* P1-P4, *fliO* comp 1-*fliP* comp 2 and Comp  $P_{flgB}$ 1-R. **SH245** ( $\Delta fliP::tet$ ,  $P_{fla/che-fliQ-cheD}$ ,  $sacA::P_{fla/che-fliO-fliP-2xHA-spec}$ ) was constructed by transforming SH104 with complementation construct generated using Gibson assembly kit (NEB, USA) utilizing primers *sacA* P1-P4, Comp  $P_{flgB}$ 1-R, and *fliOP<sub>2xHA</sub>* construct. *fliOP* was amplified using *fliO* comp 1 and *fliP* ORF R (2X HA), followed by a second round of PCR using primers *fliP* comp 1 and 2X HA R to finally obtain *fliOP<sub>2xHA</sub>* construct. **SH247** ( $\Delta fliP::tet$ ,  $P_{fla/che-fliQ-cheD}$ ,  $sacA::P_{fla/che-fliO-fliP-2xHA-spec}$ ,  $\Delta mbl::erm$ ) was constructed by transforming SH245 with gDNA from strain IB11. **SH248** ( $\Delta fliP::tet$ ,  $P_{fla/che-fliQ-cheD}$ ,  $sacA::P_{fla/che-fliO-fliP-spec}$ , *amyE::P<sub>hyper-spank</sub>-gfp-kan*) was constructed by transforming SH244 with gDNA from strain SB513. **SH249** ( $\Delta fliP::tet$ ,  $P_{fla/che-fliQ-cheD}$ ,  $sacA::P_{fla/che-fliO-fliP-spec}$ , *amyE::P<sub>hyper-spank</sub>-cat-spec*) was constructed by transforming SH244 with gDNA from strain SB463. **SH250** ( $\Delta fliP::tet$ ,  $P_{fla/che-fliQ-cheD}$ ,  $sacA::P_{fla/che-fliO-fliP-spec}$ , *amyE::P<sub>hyper-spank</sub>-cat-spec*, pHB201/*cat*, *erm*) was constructed by transforming SH249 with pHB201. **SH255** (*amyE::P<sub>hyper-spank</sub>-yueB-yfp-spec*,  $sacA::P_{hyper-spank-ymdB-kan}$ ) was constructed by transforming ET13 with gDNA from strain SH79. **SH256** (*amyE::P<sub>xyIA</sub>-spoIVFB-gfp-cat*,  $sacA::P_{hyper-spank-ymdB-kan}$ ) was constructed by transforming BDR524 with gDNA from



strain SH79. **SH257** (*amyE::P<sub>hyper-spank</sub>-yueB-yfp-spec*, *sacA::P<sub>hyper-spank</sub>-ymdB-kan*,  $\Delta$ *mbI::erm*) was constructed by transforming ET13 with gDNA from strain IB11. **SH258** (*amyE::P<sub>xyIA</sub>-spolVFB-gfp-cat*, *sacA::P<sub>hyper-spank</sub>-ymdB-kan*,  $\Delta$ *mbI::erm*) was constructed by transforming BDR524 with gDNA from strain IB11.

## METHOD DETAILS

### General growth conditions

All general methods for *Bs* were carried out as described previously (Harwood and Cutting, 1990). *Bs* cultures were inoculated at OD<sub>600</sub> 0.05 from an overnight culture and growth was carried out at 37°C in LB medium (Difco). For strains harboring genes under inducible promoters, 1 mM IPTG (Sigma-Aldrich) or 0.5% xylose (Sigma-Aldrich) was added to the medium. Antibiotics were used at the following concentrations: kanamycin (5 µg/ml, US Biological), chloramphenicol (6 µg/ml, Sigma-Aldrich), lincomycin (25 µg/ml, Sigma-Aldrich), erythromycin (1 µg/ml, Sigma-Aldrich), tetracycline (10 µg/ml, Sigma-Aldrich), spectinomycin (100 µg/ml, Sigma-Aldrich).

Transformation into *Bm* (OS2) cells was carried out as previously described (Moro et al., 1995). *Bm* cells were grown up to 1.0 OD<sub>600</sub> (10 ml). Cells were then washed with electroporation buffer [25% PEG 8000 (Promega) and 0.1 M sorbitol (Sigma-Aldrich)] and resuspended in 1 mL of the same buffer. Electroporation was carried out with 0.1 mL of cells supplemented with 500 ng of linear DNA or plasmid DNA at 1500 V (Bio-Rad). Cells were then resuspended in 1 mL LB, incubated at 37°C for 1 hr, and plated on LB plates containing 5 µg/ml tetracycline.

Scarless deletions of *E. coli* were constructed using  $\lambda$  Red system and *tet-sacB* cassette as described (Datsenko and Wanner, 2000; Li et al., 2013). 50 bp of upstream and downstream sequences of *fliOPQR* ORFs were included in the forward primer 3907 and reverse primer 3908, respectively. These primers were used for PCR amplifying *tet-sacB* cassette from XTL634. Next, the cassette was inserted into MG1655 strain, containing pKD46 carrying  $\lambda$  Red genes ( $\gamma$ ,  $\beta$  and *exo*) and a temperature sensitive origin. Around 1 Kb of recombination sequences upstream and downstream of *fliOPQR* were PCR amplified using primers 3909, 3912, 3950 and 3951. The upstream and downstream recombination sequences were ligated together by isothermal assembly (Gibson, 2011). The *tet-sacB* cassette was then replaced with the ligated DNA using similar  $\lambda$  Red system and selected on 6% sucrose (J.T.Baker). Next, the plasmid pKD46 was cured at 42°C to construct the strain **RP7802** ( $\Delta$ *fliOPQR*). Next, *tet-sacB* cassette was PCR amplified using primers 3914 and 3915. The cassette was inserted in RP7802 strain containing pKD46 using  $\lambda$  Red system. Around 1 Kb of recombination sequences upstream and downstream of *flhBA* were PCR amplified using primers 3952, 3953, 3954 and 3955. The upstream and downstream recombination sequences were ligated together by isothermal assembly and the *tet-sacB* cassette was then replaced with the ligated DNA using similar  $\lambda$  Red system. Next, the plasmid pKD46 was cured, and strain **RP7809** ( $\Delta$ *CORE* [*fliOPQRflhBA*]) constructed.  $\Delta$ *fliC::kan* allele was PCR amplified with primers 311 and 312 using pKD4 as a template. Wild-type *fliC* of DY378 was disrupted by  $\lambda$ -red recombination of  $\Delta$ *fliC::kan* allele and SK2462 strain was constructed (Datsenko and Wanner, 2000). Then  $\Delta$ *fliC::kan* allele was transferred to wild-type MG1655 by P1 transduction with SK2462 lysate to construct SK2468 (Thomason et al., 2007).

Deletion mutant in *Lm* was constructed using pLR16-PheS as previously described (Argov et al., 2017). In brief, pLR16-AB1 was transformed into *E. coli* SM-10 strain and subsequently transferred to *Lm* 10403S by conjugation. *Lm* transconjugants were selected by plating on LB agar plates supplemented with 2% glucose and containing 7.5 µg/ml chloramphenicol and 100 µg/ml Streptomycin. Transconjugants were then passaged in LB supplemented with 2% glucose and plated to obtain single colonies. Colonies were tested for sensitivity to chloramphenicol. Chloramphenicol sensitive colonies were further verified to contain the desired mutation by PCR. For disruption of the *flaA* gene, pSH22 was transformed into *E. coli* SM-10 strain and transferred to *Lm* 10403S by conjugation. *Lm* transconjugants were selected by plating on LB agar plates supplemented with 2% glucose and containing 7.5 µg/ml chloramphenicol and 100 µg/ml Streptomycin. Transconjugants were then passaged in LB supplemented with 2% glucose and 10 µg/ml chloramphenicol at 41°C and plated to obtain *flaA* disruption mutants.

### Details on plasmid construction

Plasmid constructions were performed in *E. coli* DH5 $\alpha$  using standard methods.

**pSH13** (*flhA-GFP-kan*) was constructed by amplifying the 3' region of *flhA* using the gDNA of wild-type *Bs* strain PY79, using primers *flhA* CT-F-EcoRI and *flhA* CT-R-XhoI. The PCR-amplified DNA was digested with EcoRI and XhoI and was cloned into pKL168 digested with the same enzymes.

**pSH17** (*amyE::P<sub>hyper-spank</sub>-fliP<sub>2xHA</sub>-spec*) was constructed by amplifying *fliP* using the gDNA of wild-type *Bs* strain PY79, using primers *fliP* ORF F (*Hind*III) and *fliP* ORF R (2xHA), followed by a second round of PCR using primers *fliP* ORF F (*Hind*III) and 2xHA R (*Sph*I). The PCR-amplified DNA was digested with *Hind*III and *Sph*I and was cloned into pDR111 digested with the same enzymes.

**pSH19** (*amyE::P<sub>hyper-spank</sub>-fliP<sub>2xHA-LOOP</sub>-spec*) was constructed by amplifying the 5' and 3' regions of *fliP* using the gDNA of wild-type *Bs* strain PY79. 5' region of *fliP* was amplified using primers *fliP* ORF F (pDR111) and *fliP* NT R (GSS/2xHA), and the 3' region of *fliP* was amplified using primers *fliP* CT F (GSS/2xHA) and *fliP* CT R (pDR111). The PCR-amplified DNA was cloned into pDR111 digested with *Hind*III and *Sph*I using Gibson assembly kit (NEB, USA).

**pSH21** [*amyE::P<sub>hyper-spank</sub>-CORE-F<sub>Ec</sub> (fliOPQR flhBA)-spec*] was constructed by amplifying the *Ec* CORE using the plasmid pRP7358, using primers *Ec* *fliO-flhA* F (pDR111) and *Ec* *fliO-flhA* R (pDR111). The PCR-amplified DNA was cloned into pDR111 digested with *Hind*III and *Sph*I using Gibson assembly kit (NEB, USA).

**pLR16-AB1** was constructed by amplifying approximately 1000bp fragments upstream of *fliP* and downstream of *flhA* using primers *Lm* CORE P1-P2 and *Lm* CORE P3-P4 respectively. The fragments were joined using Gibson assembly kit (NEB, USA) and further amplified by PCR using primers *Lm* CORE P1 and P4. The resultant PCR product was digested with *Xho*I and *Sal*I and cloned into pLR16-PheS digested with the same enzymes.

**pSH22** (pLR16-*Lm* *flaA* int) was constructed by amplifying approximately 450bp fragment of the *Lm* *flaA* gene, using primers *Lm* *flaA* int F and *Lm* *flaA* int R. The PCR-amplified DNA was cloned into pLR16-PheS digested with *Sal*I using Gibson assembly kit (NEB, USA).

**pSH23** (pDG1514-*Bm* *hag* int) was constructed by amplifying approximately 450bp fragment of the *Bm* *hag* gene, using primers *Bm* *hag* int F (*Sal*I) and *Bm* *hag* int R (*Bam*HI). The PCR-amplified DNA was digested with *Sal*I and *Bam*HI and was cloned into pDG1514 digested with the same enzymes.

### Nanotube visualization by XHR-SEM

Nanotube visualization was carried out as previously described (Dubey et al., 2016). Accordingly, *Bs*, *Bm*, *Ec* and *Lm* cells grown to mid logarithmic phase were spotted onto EM grids (mesh copper grids, EMS) placed over LB agar plates and incubated for 4 hr at 37°C. Cells were then washed 3 times with PBS × 1, fixed with 2% paraformaldehyde (Electron Microscopy Sciences) and 0.01% glutaraldehyde (Electron Microscopy Sciences) in sodium cacodylate buffer (0.1 M, pH 7.2, Electron Microscopy Sciences) for 10 min at 25°C. Cells were left overnight for fixation in 2% glutaraldehyde in sodium cacodylate buffer (0.1 M, pH 7.2) at 4°C. For cell dehydration, EM grids underwent a series of washes in increasing concentrations of ethanol (25, 50, 75, and 96%) (J.T.Baker) and kept in vacuum till visualization. Samples were coated and observed using Through-Lens Detector operated at Secondary Electron (TLD-SE) mode by Magellan XHR SEM (FEI).

### Immuno-XHR-SEM analysis

Immuno-XHR-SEM analysis was carried out as previously described (Dubey et al., 2016; Stempler et al., 2017). *Bs* cells were grown on EM grids (mesh copper grids, EMS), and grid-attached cells were washed three times with PBS × 1, fixed with 2% paraformaldehyde and 0.01% glutaraldehyde in sodium cacodylate buffer (0.1 M, pH 7.2) for 10 min at 25°C. Subsequently, grids were washed 3 times in PBS × 1, incubated in PBS × 1 containing 2% BSA (Amresco) and 0.1% Tween 20 (J.T.Baker) for 30 min at 25°C, and washed twice with PBS × 1. Next, grids were incubated for 2 hr at 25°C with rabbit anti-HA antibodies (Thermo Fisher Scientific, USA) or rabbit anti-GFP, diluted 1:1000 in PBS × 1 containing 1% BSA. Grids were then washed 3 times with PBS × 1 and incubated for 1 hr at 25°C with 18nm gold-conjugated goat anti-rabbit antibodies (Jackson ImmunoResearch Laboratories, USA), diluted 1:500 in PBS × 1. Grids were washed 3 times with PBS × 1 and fixed with 2.5% glutaraldehyde in sodium cacodylate buffer (0.1 M, pH 7.2) for 1 hr at 25°C. Grids were then washed gently with water, and cells were dehydrated by exposure to a graded series of ethanol washes (25, 50, 75, 95, and 100% (× 2); 10 min each), samples were kept in vacuum till visualization. Specimens were imaged without coating by Magellan XHR SEM (FEI) using Through-Lens Detector operated at Secondary Electron (TLD-SE) and Low-voltage high-Contrast backscatter electron Detector (vCD).

### Molecular exchange assay

For detecting molecular exchange, antibiotic transfer assay was carried out as described previously (Dubey and Ben-Yehuda, 2011) with some modifications. Donor and recipient strains used for the molecular exchange assays are listed in the Key resources table. Respective donor and recipient strains were grown to mid logarithmic phase, after which cells were mixed in 1:1 ratio (OD<sub>600</sub> = 0.8 or 0.08) and incubated in LB supplemented with 1 mM IPTG for 4 hr at 37°C with gentle shaking. Equal numbers of cells were spotted onto either double selective LB plates containing chloramphenicol (6 µg/ml) and kanamycin (5 µg/ml) for detection of protein exchange, or triple selective LB plates containing chloramphenicol, kanamycin and lincomycin (25 µg/ml) for detection of plasmid exchange. As a control, cells were spotted onto LB plates lacking antibiotics. Plates were incubated at 37°C.

### Motility assay

Motility assay was carried out as previously described (Kearns and Losick, 2003) with some modifications. Cells were grown to mid logarithmic phase in LB and concentrated 10 times to OD<sub>600</sub> 5.0. 5 µL of the cell suspension was spotted on freshly prepared LB plates containing 0.3% agar, incubated at 37°C for 7-9 hr, and imaged over time.

### Fluorescence microscopy

For visualization of FlhA-GFP, SpoIVFB-GFP and YueB-YFP, exponentially growing cells were harvested at an OD<sub>600</sub> 0.5, washed with PBS × 1 and observed by fluorescence microscopy. For staining bacterial membrane and nanotubes, exponentially growing cells were harvested and resuspended in PBS × 1 containing 1 µg/ml FM4-64 (Molecular Probes, Thermo Fisher Scientific) and visualized by fluorescence microscopy. *Bs*-*Bm* competition assays were carried out as described previously (Stempler et al., 2017). Overnight cultures of *Bs* and *Bm* were diluted to OD<sub>600</sub> 0.1, mixed, and mounted onto a metal ring (A-7816, Invitrogen) filled with

LB agarose (1.5%). Cells were incubated in a temperature-controlled chamber at 37°C, and followed by fluorescence microscopy. Cells were visualized by Eclipse Ti microscope (Nikon, Japan), equipped with CoolSnap HQII camera (Photometrics, Roper Scientific, USA). System control and image processing were performed with NIS Elements AR 4.3 (Nikon, Japan).

### RNA isolation and qRT-PCR

RNA was extracted from *Bs* cells grown to the mid logarithmic phase by FastRNA Pro Blue kit (MP Biomedicals) according to the manufacturer protocol. RNA concentration was determined using NanoDrop 2000C (Thermo Scientific). 2 µg RNA from each sample was treated with RQ1 DNase (2 Units, Promega), and subjected to cDNA synthesis using qScript cDNA synthesis kit (Quanta Biosciences), according to the manufacturer protocol. qRT-PCR reactions were conducted using PerfeCTa SYBR Green FastMix (Quanta Biosciences), and fluorescence detection was performed using Applied Biosystems StepOnePlus system according to manufacturer instructions. RNA from 16S rRNA was used to normalize expression. Relative gene expression and melt curve analysis was done using the Applied Biosystems StepOnePlus software (v. 2.3). Each assay was performed in duplicates with at least two RNA templates prepared from independent biological repeats. qRT-PCR primers were designed using Primer3 software (v. 0.4.0, available online).

### Phylogenetic analysis

In order to study the evolutionary conservation of the CORE complex we focused on seven proteins of *Bs* 168: the five CORE complex proteins and two exclusive proteins of the flagellar apparatus. In addition, we analyzed three proteins from *E. coli* O157:H7 str. EDL933 and one protein from *C. trachomatis* D/UW-3/CX, which are unique to the T3SS. These were searched in each of the core genomes in the STRING database, using STRING's protein homology data (Szklarczyk et al., 2017) and analyzed by custom python scripts to determine the conservation of the query proteins (Table S2). Sequence similarity scores < 0.1 were discarded. The conservation vectors of the species in each phylum were clustered using hierarchical clustering (Figure S5). Additionally, all species from all phyla were clustered together, and species clustering along with *M. fulvus* were inspected further to assess whether they include only the CORE proteins without other T3SS or flagella proteins, in a similar manner to *M. fulvus*.

PSI-BLAST was used to search several flagella unique proteins from *Bs*, along with several T3SS unique proteins from both Enterohemorrhagic *E. coli* and *C. trachomatis*, against the proteomes of the suspected species from the NCBI Assembly database. Hits adhering to stringent threshold of E-value < 0.01, spanning longer than half the length of the query with identity > 0.2, were considered putative homologs. Furthermore, a literature search was carried out by searching PubMed for the relevant species names alongside "Type III secretion system" and "flagella." Species that had putative hits for < 20% of the proteins in all categories and had no relevant results in the literature search were considered to harbor only the CORE proteins.

### QUANTIFICATION AND STATISTICAL ANALYSIS

Unless stated otherwise, bar charts display a mean ± SD from at least 3 independent biological experiments. Quantification of nanotubes were done manually. MS Excel was used for all statistical analysis, data processing and presentation.

**Cell Reports, Volume 27**

**Supplemental Information**

**A Ubiquitous Platform  
for Bacterial Nanotube Biogenesis**

**Saurabh Bhattacharya, Amit K. Baidya, Ritesh Ranjan Pal, Gideon Mamou, Yair E. Gatt, Hanah Margalit, Ilan Rosenshine, and Sigal Ben-Yehuda**



Supplemental information

Supplementary Figures

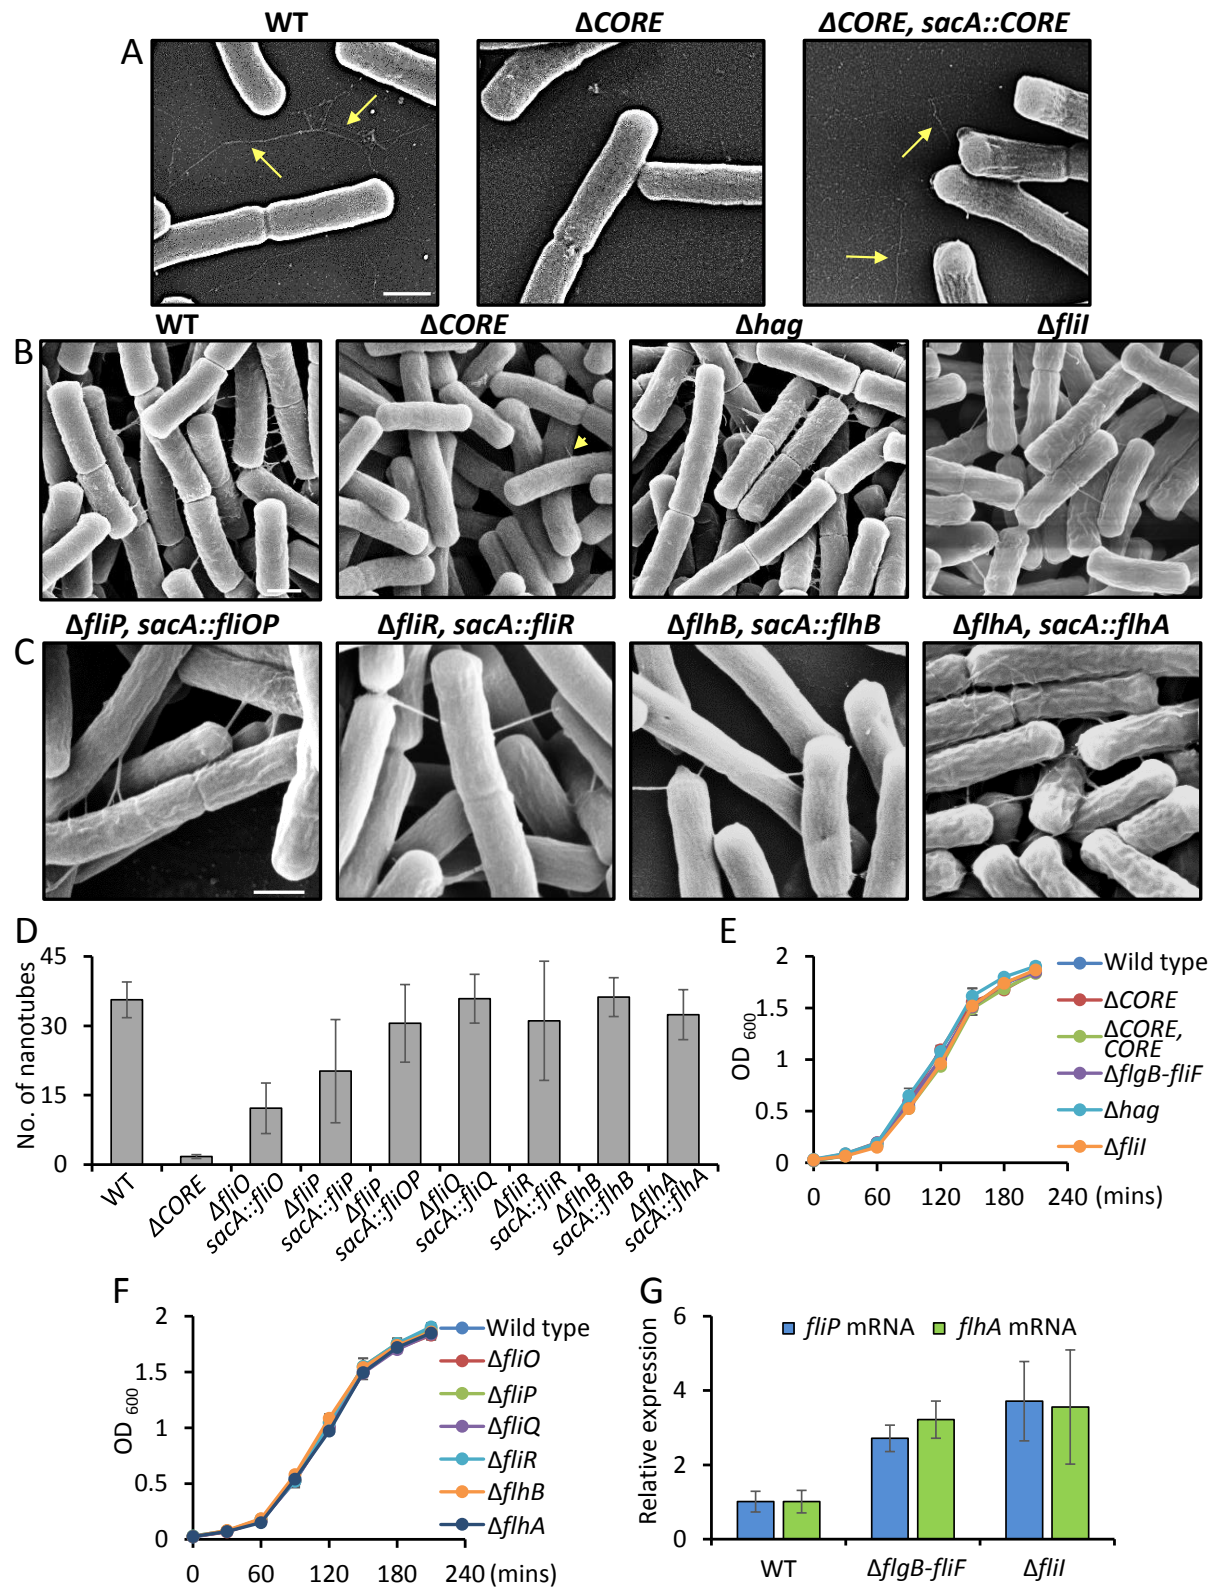

**Figure S1: *Bs* CORE mutants are impaired in nanotube formation. Related to Figures 1 and 2**

(A) PY79 (wild type), SH9 ( $\Delta$ CORE) and SH33 ( $\Delta$ CORE, *sacA::CORE*) strains were visualized by XHR-SEM to monitor the formation of extending nanotubes at low cell density. Strains were grown to mid logarithmic

phase, spotted onto EM grids at low cell density (x0.1 dilution), incubated on LB agar plates for 2 hrs at 37°C, and visualized by XHR-SEM. Arrows indicate extending nanotubes. Scale bar represents 500 nm.

**(B)** The indicated *Bs* mutant strains were visualized by XHR-SEM to monitor the formation of intercellular nanotubes. Strains were grown to mid logarithmic phase, spotted onto EM grids, incubated on LB agar plates for 4 hrs at 37°C, and visualized by XHR-SEM. PY79 (wild type) and SH9 ( $\Delta$ *CORE*) are larger fields of the images displayed in Figure 1C. Scale bar represents 500 nm.

**(C)** *Bs* *CORE* mutants were complemented with the corresponding *CORE* genes, as indicated, and were visualized by XHR-SEM to monitor the formation of intercellular nanotubes. Cells were processed for XHR-SEM as in (B). Shown are representative examples of the indicated complemented strains. Scale bar represents 500 nm.

**(D)** Quantification of the average number of nanotubes displayed per 50 cells by the indicated strains following XHR-SEM analysis described in (C). Shown are average values and SD of at least 3 independent experiments (n $\geq$ 200 for each strain).

**(E-F)** Growth kinetics of *Bs* *CORE* mutants. The indicated mutant strains were incubated in LB medium at 37°C and cell growth was followed by measuring OD<sub>600</sub> at the indicated time points.

**(G)** Expression of *CORE* genes in *Bs* non-*CORE* flagellar basal body mutants. RNA was isolated from *Bs* wild type (PY79),  $\Delta$ *flgB-fljF* (SH8) and  $\Delta$ *fliI* (SH177) cells grown to the mid logarithmic phase and the expression of *fliP* and *flhA* was determined by qRT-PCR. Transcript levels are relative to wild type (PY79). Each bar represents an average value and SD of three independent experiments.

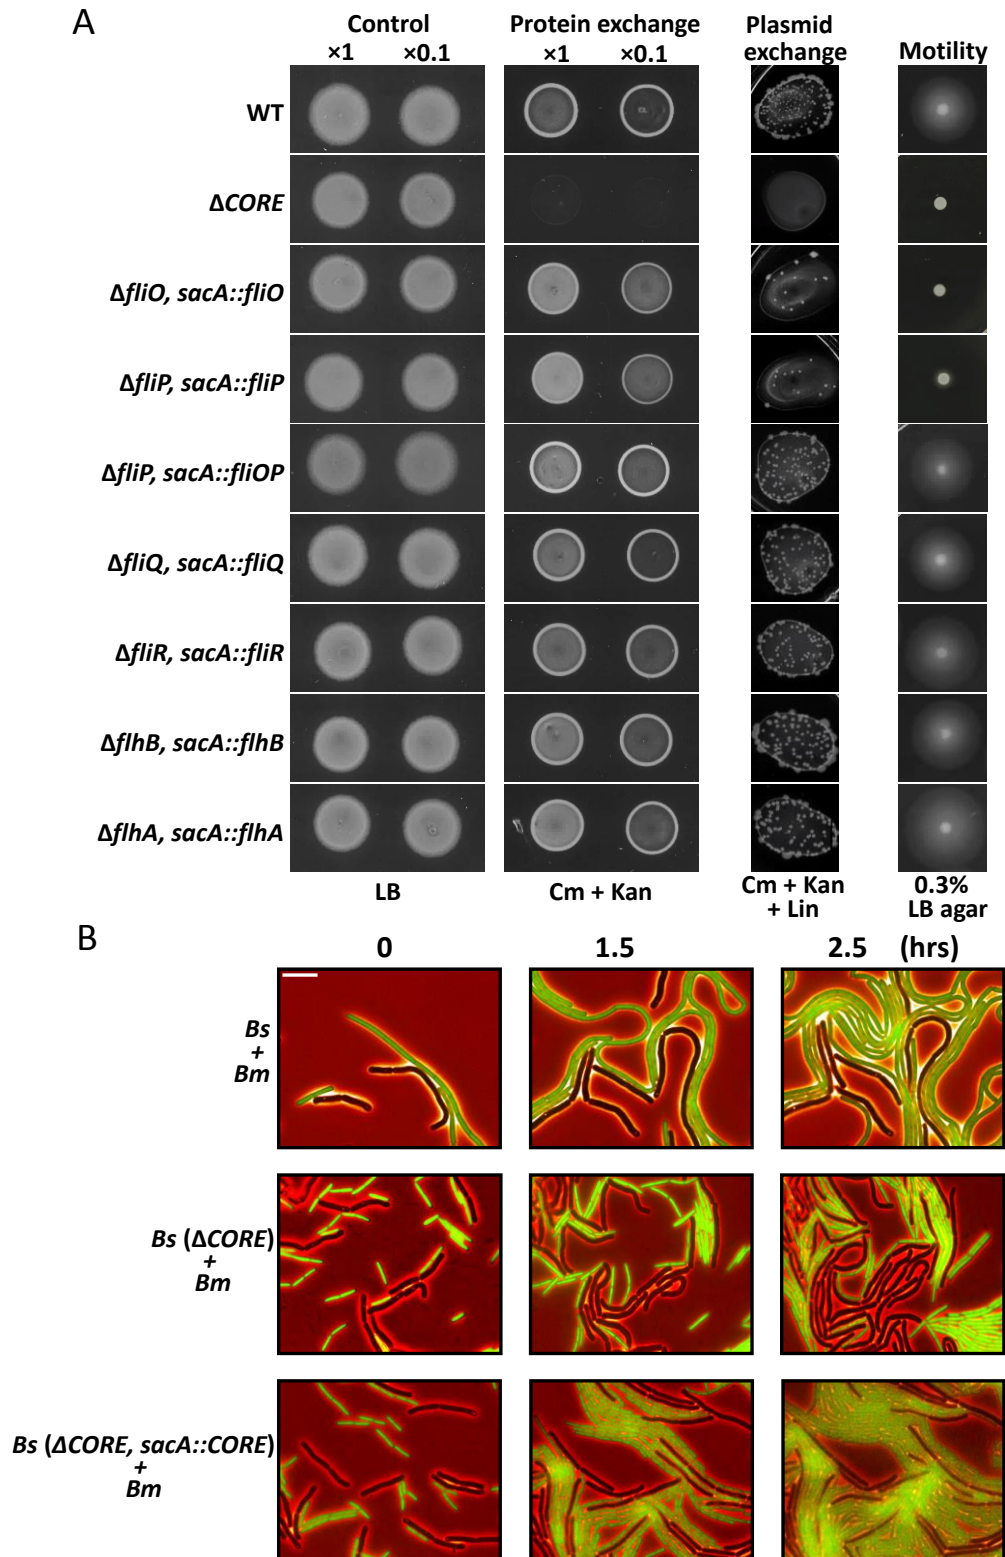

**Figure S2: *Bs* CORE mutants are impaired in nanotube mediated molecular exchange. Related to Figure 2**

(A) Assessing molecular exchange in *Bs* CORE complemented strains. For protein exchange assay, pairs of a donor (SB463: *amyE::P<sub>hyper-spank</sub>-cat-spec*) (Cm<sup>R</sup>, Spec<sup>R</sup>) and a recipient (SB513: *amyE::P<sub>hyper-spank</sub>-gfp-kan*) (Kan<sup>R</sup>) parental strains (wild type) were used. The investigated complemented strains harbor the corresponding genotypes of both donor and recipient strains. Donor and recipient strains were mixed in 1:1 ratio (at two concentrations x1, x0.1) and incubated in LB supplemented with 1 mM IPTG for 4 hrs at 37°C with gentle

shaking. Equal numbers of cells were then spotted onto LB agar (Control) and LB agar containing chloramphenicol (Cm) and kanamycin (Kan) (Protein exchange), and photographed after 18 hrs. For plasmid exchange assay, pairs of a donor (GD110: *amyE::P<sub>hyper-spank</sub>-cat-spec*, pHB201/*cat, erm*) (Cm<sup>R</sup>, Spec<sup>R</sup>, MIs<sup>R</sup>) and a recipient (SB513: *amyE::P<sub>hyper-spank</sub>-gfp-kan*) (Kan<sup>R</sup>) parental strains (wild type) were used. The investigated complemented strains harbor the corresponding genotypes of both donor and recipient strains. Cells were mixed in 1:1 ratio (concentration x1), processed as described for protein exchange, and spotted onto LB agar containing Cm, Kan and lincomycin (Lin) (Plasmid exchange). Cells were incubated at 37°C and colonies were photographed after 36 hrs of incubation. For motility assay, wild type (PY79) and the indicated strains were grown to the mid logarithmic phase and spotted onto LB plates containing 0.3% agar and photographed after 7 hrs of incubation at 37°C (Motility).

**(B)** *Bm* inhibition by *Bs* is CORE dependent. Representative time lapse microscopy images displaying mixtures of *Bs* (AR16: *amyE::P<sub>rrmE</sub>-gfp*) and *Bm* (OS2) (upper panels), *Bs* (SH30:  $\Delta$ CORE, *amyE::P<sub>rrmE</sub>-gfp*) and *Bm* (OS2) (middle panels), and *Bs* (SH41:  $\Delta$ CORE, *sacA::CORE*, *amyE::P<sub>hyper-spank</sub>-gfp*) and *Bm* (OS2) (lower panels). Shown are overlay of fluorescence from GFP (green) and phase contrast (red) images, captured at the indicated time points. *Bs* cells are shown in green while *Bm* cells are shown in black. Scale bar represents 5  $\mu$ m.



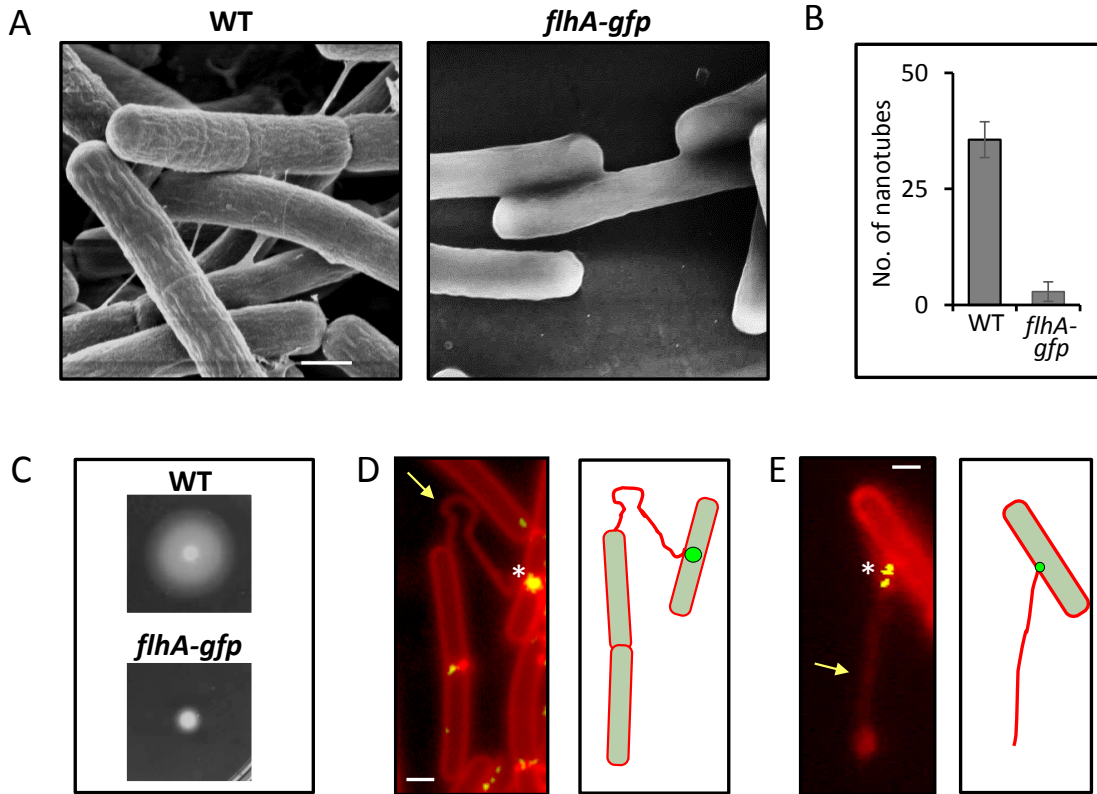

**Figure S3: FlhA localizes to the base of nanotubes. Related to Figure 3**

(A) WT (PY79) and SH47 (*flhA-gfp*) strains were visualized by XHR-SEM to monitor the formation of intercellular nanotubes. Strains were grown to mid logarithmic phase, spotted onto EM grids, incubated on LB agar plates for 4 hrs at 37°C, and visualized by XHR-SEM. Scale bar represents 0.5  $\mu$ m.

(B) Quantification of the average number of nanotubes displayed per 50 cells by the indicated strains following XHR-SEM analysis described in (A). Shown are average values and SD of at least 3 independent experiments ( $n \geq 70$  for each strain).

(C) Motility assay for PY79 (wild type) and SH47 (*flhA-gfp*) strains. Cells were grown to mid logarithmic phase, spotted onto LB plates containing 0.3% agar, and photographed after 7 hrs of incubation at 37°C.

(D-E) SH55 (*flhA-gfp*, *amyE::P<sub>hyper-spank</sub>-ymdB*,  $\Delta ymdB$ ,  $\Delta hag$ ) cells were grown in liquid LB to mid logarithmic phase, stained with a membrane dye (FM 4-64) and visualized by fluorescence microscopy. Shown are overlays of signals from FlhA-GFP (green) and FM 4-64 (red). Arrows denote nanotubes, and asterisks highlight FlhA foci at sites proximal to nanotube emanation. Schematics depict cells and nanotubes layouts (red), as well as FlhA-GFP signal (green) at sites of nanotube origin. Scale bars represent 0.5  $\mu$ m.

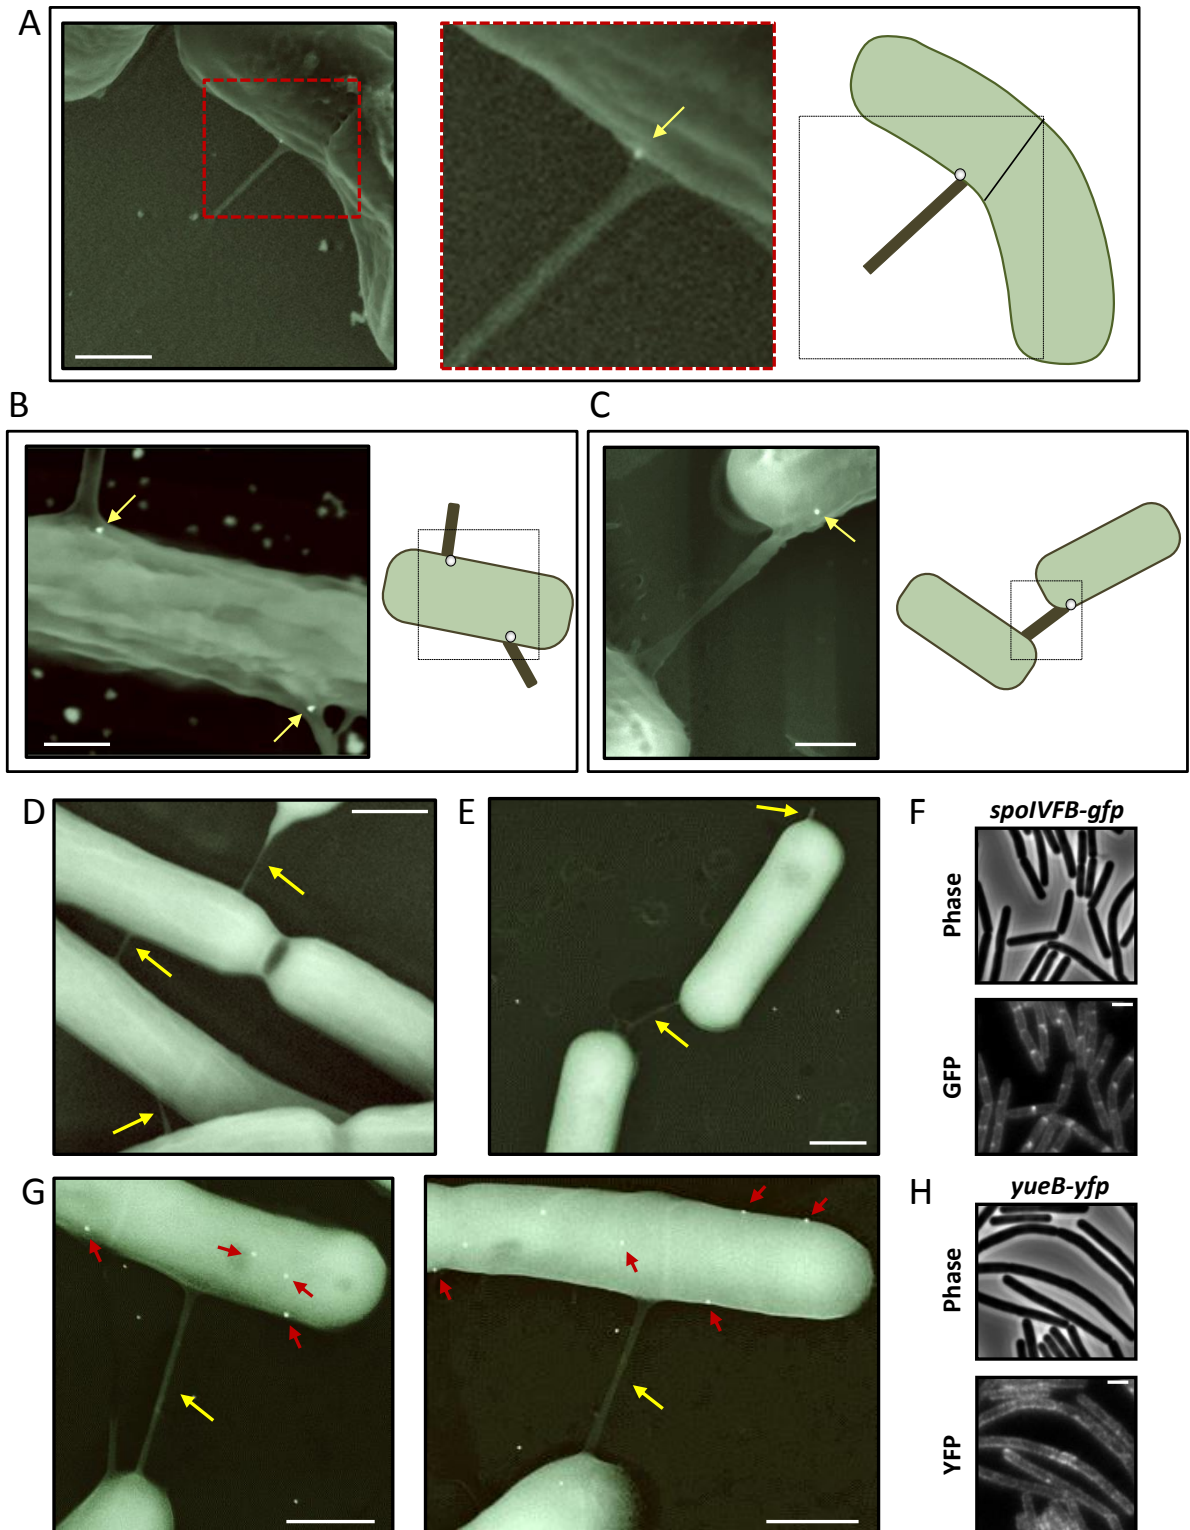

**Figure S4: FliP localizes to sites of nanotube emanation. Related to Figure 3**

(A) Cells expressing HA tagged FliP (SH110: *amyE::P<sub>hyper-spank</sub>-fliP<sub>2xHA</sub>*, *sacA::P<sub>hyper-spank</sub>-ymdB*, *ΔmbI*) were spotted onto EM grids and subjected to immuno-gold XHR-SEM using primary antibodies against HA and secondary gold-conjugated antibodies. Samples were not coated before observation. Shown are overlays of XHR-SEM images that were acquired using TLD-SE (Through lens detector- secondary electron) for nanotube visualization and vCD (low-kV high-contrast detector) for gold particle detection. An example of FliP<sub>2xHA</sub>

localization (white dot), at the site of emergence of an extending nanotube is displayed. Right panel is a magnification of the red inset in the left panel. Scale bar represents 250 nm.

**(B)** An example of FliP<sub>2xHA-LOOP</sub> localization (white dots), at the sites of nanotube emergence. SH161 (*amyE::P<sub>hyper-spank</sub>-fliP<sub>2xHA-LOOP</sub>-spec, sacA::P<sub>hyper-spank</sub>-ymdB-kan, Δ*abl*::erm*) cells were processed for immuno XHR-SEM as in (A). Shown is an overlay image of TLD-SE and vCD modes. Scale bar represents 250 nm.

**(C)** An example of localization of FliP<sub>2xHA</sub> (white dot) expressed as a sole copy, at the site of nanotube emergence. SH247 (*Δ*fliP*::tet, P<sub>fliA/che</sub>-*fliQ*-*cheD*, sacA::P<sub>fliA/che</sub>-*fliO*-*fliP*<sub>2xHA</sub>-*spec*, Δ*abl*::erm*) cells were processed for immuno XHR-SEM as in (A). Shown is an overlay image of TLD-SE and vCD modes. Scale bar represents 250 nm.

Schematics in (A-C) depict the interpretive cell layout and highlights the nanotube region with gold signal (black dashed box) captured by XHR-SEM. Arrows indicate gold signal from HA-tagged FliP.

**(D)** GB168 (*Δ*ymdB*, Δ*hag*, amyE::P<sub>hyper-spank</sub>-*ymdB**) cells, lacking HA tag, were processed for immuno XHR-SEM as in (A). Shown is an example of an overlay of XHR-SEM images that were acquired using TLD-SE and vCD modes. No gold signal was obtained from cell surface and/or nanotubes. Arrows indicate nanotubes. Scale bar represents 500 nm.

**(E)** SH258 (*amyE::P<sub>xyIA</sub>-*spoIVFB*-*gfp*-*cat*, sacA::P<sub>hyper-spank</sub>-*ymdB*-*kan*, Δ*abl*::erm*) cells, were spotted onto EM grids and subjected to immuno-gold XHR-SEM using primary antibodies against GFP and secondary gold-conjugated antibodies. Samples were not coated before observation. Shown is an example of an overlay of XHR-SEM images that were acquired using TLD-SE and vCD modes. No gold signal was obtained from cell surface and/or nanotubes. Arrows indicate nanotubes. Scale bar represents 500 nm.

**(F)** BDR524 (*amyE::P<sub>xyIA</sub>-*spoIVFB*-*gfp*-*cat**) cells were grown in liquid LB to mid logarithmic phase and visualized by fluorescence microscopy. Shown are images from phase contrast and GFP fluorescence. SpoIVFB-GFP protein localizes to the cell membrane facing the cytoplasm. Scale bar represents 1 μm.

**(G)** SH257 (*amyE::P<sub>hyper-spank</sub>-*yueB*-*yfp*-*spec*, sacA::P<sub>hyper-spank</sub>-*ymdB*-*kan*, Δ*abl*::erm*) cells, were processed for immuno XHR-SEM as in (E). Shown are examples of overlays of XHR-SEM images that were acquired using TLD-SE and vCD. Yellow arrows indicate nanotubes. Red arrows indicate signal from YueB-YFP. Scale bar represents 500 nm.

**(H)** ET13 (*amyE::P<sub>hyper-spank</sub>-*yueB*-*yfp*-*spec**) cells were grown in liquid LB to mid logarithmic phase and visualized by fluorescence microscopy. Shown are images from phase contrast and YFP fluorescence. YueB-YFP receptor protein localizes to the cell circumference. Scale bar represents 1 μm.

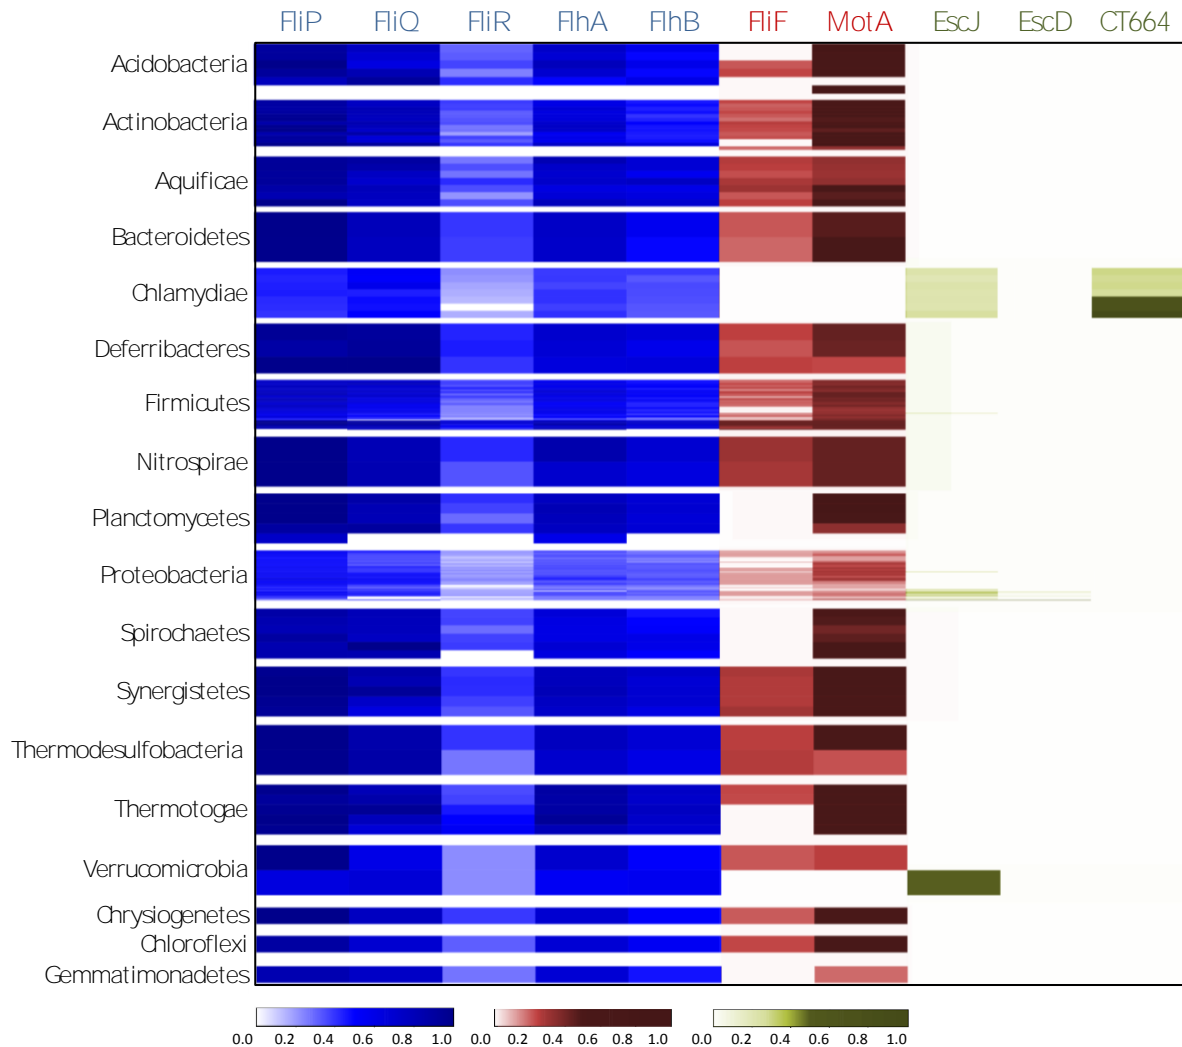

**Figure S5: The spread of CORE complex in diverse bacterial phyla. Related to Figure 4**

Heatmap showing the conservation of proteins comprising flagella or injectisome in different bacterial phyla. Each row depicts a single species from the STRING database representative genomes, which is included in the respective phylum listed on the left. Each column represents a single protein (blue: CORE proteins; red: exclusive proteins of the flagella apparatus; green: proteins that are unique to the injectisome apparatus). The proteins used as a reference derived from *Bs* flagella (blue and red proteins), from Enterohemorrhagic *E. coli* injectisome (EscJ,D) and from *C. trachomatis* injectisome (CT664). The sequence similarity scores are based on homology data extracted from the STRING database. Color ranges at the bottom represent the STRING sequence similarity scores. See also Table S2 for detailed analysis.



**Table S1: Conservation of CORE proteins in distinct bacterial species. Related to Figure 4**  
 Conservation analysis of CORE proteins in *Bm* (DSM319), *Lm* (10403S) and *Ec* (K12 MG1655) by NCBI Protein BLAST, using the corresponding *Bs* PY79 CORE protein sequences as query.

|             |                    | <i>Bm</i>   | <i>Lm</i>   | <i>Ec</i>   |
|-------------|--------------------|-------------|-------------|-------------|
| <b>FliO</b> | Query Coverage (%) | 82          | -           | 10          |
|             | Identities (%)     | 36          | -           | 36          |
|             | Positives (%)      | 62          | -           | 48          |
|             | E- value           | $7e^{-32}$  | -           | 1.2         |
| <b>FliP</b> | Query Coverage (%) | 100         | 95          | 95          |
|             | Identities (%)     | 79          | 34          | 54          |
|             | Positives (%)      | 92          | 62          | 72          |
|             | E- value           | $2e^{-130}$ | $3e^{-45}$  | $2e^{-76}$  |
| <b>FliQ</b> | Query Coverage (%) | 100         | 50          | 100         |
|             | Identities (%)     | 72          | 44          | 51          |
|             | Positives (%)      | 88          | 62          | 69          |
|             | E- value           | $1e^{-38}$  | $5e^{-08}$  | $4e^{-14}$  |
| <b>FliR</b> | Query Coverage (%) | 99          | 91          | 88          |
|             | Identities (%)     | 55          | 24          | 28          |
|             | Positives (%)      | 75          | 49          | 50          |
|             | E- value           | $5e^{-86}$  | $1e^{-16}$  | $1e^{-16}$  |
| <b>FlhB</b> | Query Coverage (%) | 99          | 93          | 95          |
|             | Identities (%)     | 59          | 34          | 39          |
|             | Positives (%)      | 76          | 59          | 62          |
|             | E- value           | $7e^{-149}$ | $3e^{-62}$  | $3e^{-73}$  |
| <b>FlhA</b> | Query Coverage (%) | 100         | 99          | 97          |
|             | Identities (%)     | 97          | 36          | 45          |
|             | Positives (%)      | 86          | 59          | 64          |
|             | E- value           | 0           | $3e^{-128}$ | $3e^{-175}$ |

**Table S2: Table showing the conservation of proteins comprising different flagella or type III secretion system (T3SS) subunits in different bacterial species. Related to Figure 4**

(Provided as a separate Excel file)

Each row represents a single species from the STRING core genomes and each column represents one protein. The protein names are followed by the species of origin (Bacillus: *B. subtilis* proteins; EHEC: Enterohemorrhagic *E. coli* proteins; Chlamydia: *C. trachomatis* protein). The sequence similarity scores are based on the STRING database homology data. Species lacking any homolog were excluded from the analysis.

**Table S3. List of primers used in this study. Related to STAR Methods**

| <b>Primer name</b>             | <b>Primer sequence (5'-3')</b>                      |
|--------------------------------|-----------------------------------------------------|
| <i>P<sub>flgB1</sub></i>       | GTTGACCAGTGCTCCCTGCAATAAGCTTTATTTCTGGGTTG           |
| <i>P<sub>flgB2</sub></i>       | GCTCAAATCCACTTACCTCCA                               |
| <i>flgB-fljF</i> KO P1         | CCAGCAAATTGAAAATGATCG                               |
| <i>flgB-fljF</i> KO P2         | CTGAGCGAGGGAGCAGAACAATCCACTTACCTCCATTTCA            |
| <i>flgB-fljF</i> KO P3         | TGGAGGTAAGTGGATTTGAGCATGGCGAGACGTGATCAAGATA         |
| <i>flgB-fljF</i> KO P4         | ATATCATCCCCTCCGCTCT                                 |
| <i>CORE</i> KO P1              | TGATGATGAAATGCTGGTGAA                               |
| <i>CORE</i> KO P2              | CTGAGCGAGGGAGCAGAATTTCAACAGTCGTACACCCTTT            |
| <i>CORE</i> KO P3              | TGGAGGTAAGTGGATTTGAGCATGAAAATAAAAAAATTTACTGCTGCT    |
| <i>CORE</i> KO P4              | CACATTCTGGCCGTTAGTCA                                |
| <i>sacA</i> P1                 | CAGCATTTTCCGCTTTTCTC                                |
| <i>sacA</i> P2                 | AGCCTGCCCTTTCAAATTCT                                |
| <i>sacA</i> P3                 | GTTGACCAGTGCTCCCTGTGTTTTCCCTCAAGGATCG               |
| <i>sacA</i> P4                 | TTTTCAAACATTCCGGTGT                                 |
| Comp <i>P<sub>flgB1</sub></i>  | AGAATTTGAAAGGGCAGGCTCAATAAGCTTTATTTCTGGGTTG         |
| Comp <i>P<sub>flgB2</sub></i>  | CAATAAAAATATTGACTCTTTTTTCATGCTCAAATCCACTTACCTCCA    |
| Comp <i>P<sub>flgB2a</sub></i> | GCACAGTAGCATGGTTATTCATGCTCAAATCCACTTACCTCCA         |
| Comp <i>P<sub>flgB</sub>R</i>  | GCTCAAATCCACTTACCTCCA                               |
| <i>Bs CORE</i> comp1           | ATGAAAAAGAGTCAATATTTTATTG                           |
| <i>Bs CORE</i> comp2           | CTGAGCGAGGGAGCAGAATTAATATCCACCCTCCAATG              |
| Comp <i>P<sub>HS1</sub></i>    | AGAATTTGAAAGGGCAGGCTCTCGAGGGTAAATGTGAGCA            |
| Comp <i>P<sub>HS2</sub></i>    | CAATAAAAATATTGACTCTTTTTTCATCATAGTAGTTCACCACCTTTAAGC |
| <i>ymdB</i> R                  | CTGAGCGAGGGAGCAGAACTATTCAAAGAACATGTGATCATCG         |
| <i>fliO</i> KO P1              | TGATGATGAAATGCTGGTGAA                               |
| <i>fliO</i> KO P2              | CTGAGCGAGGGAGCAGAATTTCAACAGTCGTACACCCTTT            |
| <i>fliO</i> KO P3              | TGGAGGTAAGTGGATTTGAGCATGAATGAGTTTATAAATATTTTCAGTTC  |
| <i>fliO</i> KO P4              | AAAAAGCAGGAAATAAGTCAATAA                            |
| <i>fliP</i> KO P1              | GCAGCATTTATGCGAATGAT                                |
| <i>fliP</i> KO P2              | CTGAGCGAGGGAGCAGAAGATGACGTGGGCCTTTCTT               |
| <i>fliP</i> KO P3              | TGGAGGTAAGTGGATTTGAGCGTGAGTTCAGAATTTGTAATTTCTATGG   |
| <i>fliP</i> KO P4              | AAAACATTCCGGACAACGAC                                |
| <i>fliQ</i> KO P1              | AATATTGGCGGCACATCG                                  |
| <i>fliQ</i> KO P2              | CTGAGCGAGGGAGCAGAAAACCTCACGTTTAGCACCTACCC           |
| <i>fliQ</i> KO P3              | TGGAGGTAAGTGGATTTGAGCATGAATTCAATTATTGACTTATTTCTGCT  |
| <i>fliQ</i> KO P4              | TCATTGTGAGCGATTCGGTA                                |
| <i>fliR</i> KO P1              | AACAAAACCGTTCTGAAGGAAA                              |
| <i>fliR</i> KO P2              | CTGAGCGAGGGAGCAGAATTCATCTCTACATTACCCTGCAA           |
| <i>fliR</i> KO P3              | TGGAGGTAAGTGGATTTGAGCATGAAGCTTAGAGTTGACCTGCAG       |
| <i>fliR</i> KO P4              | GCCTGGTCAATTTCCACTTG                                |
| <i>flhB</i> KO P1              | CGGGCCATTATTGGCTATT                                 |
| <i>flhB</i> KO P2              | CTGAGCGAGGGAGCAGAACTTCATTAAGAAACACCGACCA            |
| <i>flhB</i> KO P3              | TGGAGGTAAGTGGATTTGAGCATGTCAACAAGAGATTTATCCGTT       |
| <i>flhB</i> KO P4              | GAACAACACTTTCCAGGGCTTTT                             |
| <i>flhA</i> KO P1              | CCGCCGTTTCTTTACTGGT                                 |
| <i>flhA</i> KO P2              | CTGAGCGAGGGAGCAGAACTCTTGTTGACATGCTGTTTTT            |
| <i>flhA</i> KO P3              | TGGAGGTAAGTGGATTTGAGCATGAAAATAAAAAAATTTACTGCTGCT    |
| <i>flhA</i> KO P4              | CACATTCTGGCCGTTAGTCA                                |
| <i>Ec CORE</i> comp1           | ATGAATAACCATGCTACTGTGC                              |
| <i>Ec CORE</i> comp2           | CTGAGCGAGGGAGCAGAACTTGCACCAGCAGCGGAAAC              |
| <i>fliI</i> KO P1              | GAGAGTCATTCCGATGTTG                                 |
| <i>fliI</i> KO P2              | CTGAGCGAGGGAGCAGAATCAGCTGCACCTGCTTCC                |
| <i>fliI</i> KO P3              | TGGAGGTAAGTGGATTTGAGCGTGGCTTATCAATTTAGATTCCAAAAG    |
| <i>fliI</i> KO P4              | ATAGGTTGCTGCTTGCTCAG                                |
| <i>flhA</i> CT-F- <i>EcoRI</i> | TAGTAGGAATTCCAGTAGTTGATCCTGCATCAGTC                 |
| <i>flhA</i> CT-R- <i>XhoI</i>  | CTACTACTCGAGAATATCCACCCTCCAATGCTT                   |

|                                      |                                                                              |
|--------------------------------------|------------------------------------------------------------------------------|
| <i>fliP</i> ORF F ( <i>Hind</i> III) | AAACCCAAGCTTAAAGGTGGTGAACACTACTATGAATGAGTTTATAAATATTTT CAGTTC                |
| <i>fliP</i> ORF R (2X HA)            | CATAGGGATAGCCAGCGTAATCTGGAACATCATATGGGTAAAAGCTCTGAA GCAAAGATTTTC             |
| 2X HA R ( <i>Sph</i> I)              | ACCTAGGCATGCTTATGCGTAGTCCGGGACGTCATAGGGATAGCCAGCGTA A                        |
| 2X HA R                              | CTGAGCGAGGGAGCAGAATTATGCGTAGTCCGGGACGTCATAGGGATAGCC AGCGTAA                  |
| <i>fliP</i> ORF F (pDR111)           | AATTGTGAGCGGATAACAATTAAGCTTAAAGGTGGTGAACACTACTATGAATG AGTTTATAAATATTTTCAGTTC |
| <i>fliP</i> NT R (GSS/2X HA)         | CATAGGGATAGCCAGCGTAATCTGGAACATCATATGGGTAGGAACTACCAT CCATTTTCGCGTAATTCA       |
| <i>fliP</i> CT F (GSS/2X HA)         | TTACGCTGGCTATCCCTATGACGTCCCGGACTACGCAGGATCGAGTAAACCT GAATCATTAAAGGATATT      |
| <i>fliP</i> CT R (pDR111)            | CCACCGAATTAGCTTGCATGCCTAAAAGCTCTGAAGCAAAGA                                   |
| <i>Ec fliO-flhA</i> F (pDR111)       | AATTGTGAGCGGATAACAATTAAGCTTAAAGGTGGTGAACACTACTATGAATA ACCATGCTACTGTGC        |
| <i>Ec fliO-flhA</i> R (pDR111)       | CCACCGAATTAGCTTGCATGCCTTGCACCAGCAGCGGAAAC                                    |
| <i>Lm CORE</i> P1                    | CCCAAACCTCGAGTCAGAGATATCAAGGACTTTTC                                          |
| <i>Lm CORE</i> P2                    | ATCTTTTCTACTAAATGTTTTCCCATTTAGTCTCTCTTTTCAAAG                                |
| <i>Lm CORE</i> P3                    | CTTTTGAAAGAGGAGACTAAGG CAATGGGAAAACATTTAGTAGAAAAGAT                          |
| <i>Lm CORE</i> P4                    | AAACCCGTCGACCCAGAAGAAAATGTAAAGCACGTTA                                        |
| <i>fliO</i> comp1                    | TGGAGGTAAGTGGATTTGAGCATGAAAAAGAGTCAATATTTTATTG                               |
| <i>fliO</i> comp2                    | CTGAGCGAGGGAGCAGAATCATTTCATGATGACGTGG                                        |
| <i>fliP</i> comp1                    | TGGAGGTAAGTGGATTTGAGCATGAATGAGTTTATAAATATTTTCAGTTC                           |
| <i>fliP</i> comp2                    | CTGAGCGAGGGAGCAGAACTAAAAGCTCTGAAGCAAAGATTTTC                                 |
| <i>fliQ</i> comp1                    | TGGAGGTAAGTGGATTTGAGCATGAGTTCAGAATTTGTAATTTCT                                |
| <i>fliQ</i> comp2                    | CTGAGCGAGGGAGCAGAATTACCCTGCAAACGATTTA                                        |
| <i>fliR</i> comp1                    | TGGAGGTAAGTGGATTTGAGCATGAATTCATTTACTTATTTC                                   |
| <i>fliR</i> comp2                    | CTGAGCGAGGGAGCAGAATTAAGAAACACCCGACCAATG                                      |
| <i>flhB</i> comp1                    | TGGAGGTAAGTGGATTTGAGCATGAAGCTTAGAGTTGACCT                                    |
| <i>flhB</i> comp2                    | CTGAGCGAGGGAGCAGAATCAATATACTTTTTGTTTTGTTTTATATACG                            |
| <i>flhA</i> comp1                    | TGGAGGTAAGTGGATTTGAGCATGTCAACAAGAGATTTATCCGTT                                |
| <i>flhA</i> comp2                    | CTGAGCGAGGGAGCAGAATTAATATCCACCCTCCAATGC                                      |
| <i>Lm CORE</i> comp1                 | TGGAGGTAAGTGGATTTGAGCATGCGTAAAATAGCCTCTAGACGA                                |
| <i>Lm CORE</i> comp2                 | CTGAGCGAGGGAGCAGAATCAAGTTGGTTCAATCAGTGC                                      |
| <i>Bm CORE</i> comp1                 | TGGAGGTAAGTGGATTTGAGCATGCTGCGAAAGTTTCGTAATTG                                 |
| <i>Bm CORE</i> comp2                 | CTGAGCGAGGGAGCAGAATCAGATATCCACCCTCCAACA                                      |
| <i>Lm flaA</i> int F                 | TACCGGGCCCCCTCGAGGTGACCTTGCAACGTATGCGTCAAT                                   |
| <i>Lm flaA</i> int R                 | TATCAAGCTTATCGATACCGCGATGGATTGATTGTTTACG                                     |
| <i>Bm hag</i> int F ( <i>Sal</i> I)  | AAACCCGTCGACTCAGGTCAGCGCATTAACAA                                             |
| <i>Bm hag</i> int R ( <i>Bam</i> HI) | AAACCCGGATCCTAGCGGCATCTGCACTTAAA                                             |
| 311                                  | GGTGGAAACCAATACGTAATCAACGACTTGCAATATAGGATAACGAATCG TGTAGGCTGGAGCTGCTTC       |
| 312                                  | ATCAGGCAATTTGGCGTTGCCGTCAGTCTCAGTTAATCAGGTTACAACGACA TATGAATATCCTCCTTA       |
| 3907                                 | ACCGATATCATTACCCCGTCCGAGCGGATGCGCCGCCTGAGCCGTTAGTGTC CTAATTTTTGTTGACACTCTATC |
| 3908                                 | GATATTATTTTCGGATAATCCTTAGGGTAGCATGATAAACGTTACGGAAAT CAAAGGGAAAACGTCCATA      |
| 3909                                 | GAAAGCGATTAATCCGCTGG                                                         |
| 3912                                 | GTCACATTATCCGTCAGTCG                                                         |
| 3950                                 | CATGATAAACGTTACGGAACACTAACGGCTCAGGCGGCGCATTTCG                               |
| 3951                                 | CGAATGCGCCGCTGAGCCGTTAGTGTTCGTAACGTTTATCATG                                  |
| 3914                                 | TTTGCCTCTGGCATCATTTACGCTCAATACTCTTTCCAGGATTGGCGACTCC TAATTTTTGTTGACACTCTATC  |
| 3915                                 | GCGGCTTGCAACCAGCAGCGGAAACAATAATATTGCTAATAAGGCTCTCATAT CAAAGGGAAAACGTCCATA    |



|      |                                       |
|------|---------------------------------------|
| 3952 | GTGGCTATGTGGTGAAGCC                   |
| 3953 | GCTAATAAGGTTCTCATGTCGCCAATCCTGGAAAGAG |
| 3954 | CTCTTCCAGGATTGGCGACATGAGAACCTTATTAGC  |
| 3955 | CGTGATCAAATCATGCCTGC                  |

All primers were designed during this study, and synthesized by Integrated DNA Technologies (IDT).
